# Supplementary material for: A pattern of continuity from health to disease in neuropsychiatric genetic risk affecting brain morphology
Source: Research Square preprint supplement (doi:10.21203/rs.3.rs-4542520/v1), 2024-12-12
Supplement: Supplementary file 2 [file a040ce4d8f3775b9b1e680b6.xlsx]

## Sheet: Table of Contents
Table of Contents
Table S1. References and sample sizes for summary statistics of 15 neuropsychiatric phenotypes.
Table S2. Results of Cortical morphology-PRS association analysis.
Table S3. Results of Cortical morphology-PRS association analysis(controlled for global effects).
Table S4. Results of Subcortical morphology-PRS association analysis. (Subsetted and all)
Table S5. Results of Subcortical morphology-PRS association analysis (controlled for global effects). (Subsetted and all)
Table S6. Results of bidirectional GSMR analysis.
Table S7. Results of forward MR analysis.
Table S8. Results of comparative analysis contrasting brain maps associated with disease states and genetic risk.
Table S9. Results of binomial analysis.
Table S10. Results of sex differences in brain morphology-PRS association analysis.
Table S11. Results of posthoc sex-stratified in brain morphology-PRS association analysis.(BPD-specific)

## Sheet: S1
Table S1. References and sample sizes for summary statistics of 14 neuropsychiatric phenotypes. (* means removal due to overlap with UKB data)
Phenotype	Reference	DOI	NCases	NControls	NSamples
Attention Deficit Hyperactivity Disorder - European subsample	Demontis et al., Nature Genetics 2022	https://doi.org/10.1038/s41588-018-0269-7	38691	186843	225534
Attention Deficit Hyperactivity Disorder - Childhood subsample	Rajagopal et al, 2022, Nature Genetics 2022	https://doi.org/10.1038/s41588-022-01143-7	15338	45398	60736
Attention Deficit Hyperactivity Disorder - Adulthood subsample			6961	38303	45264
Autism Spectrum Disorder	Grove et al., Nature Genetics 2019	https://doi.org/10.1038/s41588-019-0344-8	18381	27969	46350
Anorexia Nervosa*	Watson et al., Nature Genetics 2019	https://doi.org/10.1038/s41588-019-0439-2	16992	55525	72517
Bipolar Disorder	Mullins et al., Nature Genetics, 2021	https://doi.org/10.1038/s41588-021-00857-4	41917	371549	413466
Schizophrenia - European subsample	Trubetskoy et al., Nature 2022	https://doi.org/10.1038/s41586-022-04434-5	53886	77258	131144
Major Depressive Disorder	Wray et al., Nature Genetics 2018	https://doi.org/10.1038/s41588-018-0090-3	59851	113154	173005
Post-traumatic stress disorder - European subsample	Nievergelt et al., Nature Communications 2019	https://doi.org/10.1038/s41467-019-12576-w	20329	124440	144769
Obsessive compulsive disorder	Arnold et al., Molecular Psychiatry 2018	https://doi.org/10.1038/mp.2017.154	2699	7037	9736
Tourette’s Syndrome	Yu et al., American Journal of Psychiatry 2019	https://doi.org/10.1176/appi.ajp.2018.18070857	4819	9488	14307
Alzheimer’s disease	Kunkle et al., Nature Genetics 2019	https://doi.org/10.1038/s41588-018-0311-9	17008	37514	54522
Frontotemporal dementia	Ferrari et al., Lancet Neurology 2014	https://doi.org/10.1016/S1474-4422(14)70065-1	2154	4308	6462
Parkinson’s disease	Nalls et al., Nature Genetics 2014	https://doi.org/10.1038/ng.3043	13708	95282	108990
Amyotrophic lateral sclerosis	Rheenen et al., Nature Genetics 2016	https://doi.org/10.1038/ng.3622	12577	23475	36052
Epilepsy	Abou-Khalil, Nature Communications 2018	https://doi.org/10.1038/s41467-018-07524-z	15212	29677	44889

## Sheet: S2
Table S2. Results of Cortical morphology-PRS association analysis. (Chen atlas)
beta	ADHD	ASD	BPD	MDD	OCD	PTSD	SZ	TS	AD	ALS	EP	FTD	PD
superior_temporal_area	-0.0592179	-0.00538244	0.00797929	-0.0151394	0.00440953	-0.0224662	-0.0151394	-0.00591684	-0.00320429	-0.00108176	-0.000575079	-0.00196671	0.0366676
superior_parietal_area	-0.0419721	-0.00514704	0.00705016	0.000462288	0.00161388	-0.0210507	0.000462288	-0.00597236	-0.00344103	-0.00486946	0.00566602	-0.000557826	0.040966
precuneus_area	-0.0439769	-0.00574905	0.00793605	-0.0113717	0.00241129	-0.0215186	-0.0113717	-0.00784193	-0.00493953	0.00422423	0.00340335	0.00145871	0.0399354
posterolateral_temporal_area	-0.0605814	-0.00407409	0.0115925	-0.00362128	0.00329199	-0.0219012	-0.00362128	-0.0105397	0.00184935	-0.00619313	-0.00160992	-0.00455954	0.039182
pars_opercularis_area	-0.0546474	-0.01115	0.00899759	-0.0124481	-0.00330503	-0.030507	-0.0124481	-0.0136131	-0.00176919	0.00107695	-0.00181887	-0.00330298	0.0430877
orbitofrontal_area	-0.0534654	-0.00276939	0.0130284	-0.00685435	0.00252604	-0.0274154	-0.00685435	-0.00747521	-0.0059537	-0.00269295	0.00204441	-0.00290779	0.0446513
occipital_area	-0.0432759	-0.0159237	0.00241938	-0.00797332	0.00249719	-0.0236178	-0.00797332	-0.0103303	0.00455017	0.00850093	0.00902419	-0.000346392	0.0462876
motor_premotor_area	-0.0444786	-0.00567762	0.0114518	-0.0044191	0.00154087	-0.0229403	-0.0044191	-0.00629896	-0.00340888	-0.00163236	0.00570349	-0.00475877	0.0418024
inferior_parietal_area	-0.0564662	-0.0112464	0.00951163	-0.00934009	0.00331025	-0.0279117	-0.00934009	-0.00981438	0.00138444	-0.00288021	-0.00498736	0.000631522	0.04325
dorsomedial_frontal_area	-0.0488951	-0.00437239	0.011154	-0.0106555	-0.00199679	-0.0264998	-0.0106555	-0.00946897	-0.00409618	0.000668334	0.00345429	-0.00314035	0.0427006
dorsolateral_prefrontal_area	-0.0571951	-0.00515302	0.0047882	-0.0140047	0.00501656	-0.0317184	-0.0140047	-0.0111973	-0.00374069	-0.00754982	0.00176944	-0.0097991	0.0474447
anteromedial_temporal_area	-0.0553718	-0.0160039	0.00235805	-0.0135019	0.000342704	-0.0251107	-0.0135019	-0.00665183	-0.000837124	0.00196003	-0.00227332	-0.00278322	0.0378263
ventromedial_occipital_thickness	-0.00292168	0.00594401	-0.00949391	-0.00802994	0.00518304	-0.00532826	-0.00802994	0.00379093	0.00534679	-0.0111306	0.00131604	-0.0148155	-0.00253959
ventral_frontal_thickness	0.0191589	0.0112121	-0.0156385	-0.00959327	0.006627	0.0020144	-0.00959327	0.00188805	-0.00227485	-0.0185609	-0.0030448	-0.0143484	-0.0172338
temporal_pole_thickness	-0.000512238	0.00764488	-0.00994214	-0.0192514	0.00121081	-0.0100997	-0.0192514	-0.0071413	0.0018366	-0.0175442	-0.00498797	-0.016381	-0.00185264
superior_parietal_thickness	-0.00853255	0.00977251	-0.00866056	-0.00156183	0.00649945	0.00484151	-0.00156183	0.00285252	-0.000402597	-0.00239228	-0.000798315	0.00128341	-0.00797763
perisylvian_thickness	-0.00878656	0.00469485	-0.0118201	-0.014354	0.0123583	-0.00505939	-0.014354	0.00904089	0.00601927	-0.0119391	-0.00536318	-0.00842759	0.0021417
occipital_thickness	0.00262929	0.00931382	-0.0109336	-0.0043446	0.00518234	0.00712661	-0.0043446	0.00266791	0.00638718	-0.0099506	0.000931219	-0.00562726	-0.00503562
motor_premotor_SMA_thickness	-0.0100717	0.00917358	-0.00773755	-0.00141922	0.0151794	0.0040044	-0.00141922	0.00629188	0.00557431	-0.00927137	-0.0028739	-0.000741575	-0.0125227
middle_temporal_thickness	-0.00185293	0.00473827	-0.00858775	-0.011874	0.00228131	-0.00418015	-0.011874	0.00447959	0.000153182	-0.0111524	-0.00535453	-0.00544503	-0.00953129
medial_temporal_thickness	0.00405526	0.00527037	-0.0110624	-0.00874677	0.00504139	-0.00270967	-0.00874677	-0.00186514	0.0017306	-0.0122292	-0.000324824	-0.014228	-0.0128971
medial_prefrontal_thickness	0.0118738	0.00907863	-0.00959553	-0.000412482	0.00741004	0.00510082	-0.000412482	0.0075141	-0.000752809	-0.00332903	-0.00706363	-0.00310732	-0.0102332
inferior_parietal_thickness	0.00352101	0.00715869	-0.013833	-0.00635911	0.00890959	0.0031796	-0.00635911	0.00450189	-0.00697672	-0.00974129	-0.00178439	-0.00665845	-0.0114567
dorsolateral_prefrontal_thickness	0.00757242	0.00964047	-0.0163959	-0.00778822	0.00826062	0.00393934	-0.00778822	0.00386595	-0.00394536	-0.0128724	-0.0025432	-0.008145	-0.0123134
total_surface_area	-0.0598561	-0.00898192	0.00942808	-0.00978198	0.00249344	-0.0293174	-0.00978198	-0.0103811	-0.00145278	-0.0011612	0.00236283	-0.00336327	0.0489594
mean_thickness	-0.00216013	0.00911711	-0.0126412	-0.00947569	0.00923097	-0.000403119	-0.00947569	0.00341709	0.000541101	-0.0139108	-0.00374661	-0.0104422	-0.0095827
Conf. Interval (95%, round up)	ADHD	ASD	BPD	MDD	OCD	PTSD	SZ	TS	AD	ALS	EP	FTD	PD
superior_temporal_area	[-0.07, -0.049]	[-0.016, 0.005]	[-0.003, 0.019]	[-0.026, -0.004]	[-0.006, 0.015]	[-0.033, -0.012]	[-0.026, -0.004]	[-0.017, 0.005]	[-0.014, 0.007]	[-0.012, 0.01]	[-0.011, 0.01]	[-0.013, 0.009]	[0.026, 0.047]
superior_parietal_area	[-0.053, -0.031]	[-0.016, 0.006]	[-0.004, 0.018]	[-0.01, 0.011]	[-0.009, 0.012]	[-0.032, -0.01]	[-0.01, 0.011]	[-0.017, 0.005]	[-0.014, 0.007]	[-0.016, 0.006]	[-0.005, 0.016]	[-0.011, 0.01]	[0.03, 0.052]
precuneus_area	[-0.055, -0.033]	[-0.016, 0.005]	[-0.003, 0.019]	[-0.022, -0.001]	[-0.008, 0.013]	[-0.032, -0.011]	[-0.022, -0.001]	[-0.018, 0.003]	[-0.016, 0.006]	[-0.006, 0.015]	[-0.007, 0.014]	[-0.009, 0.012]	[0.029, 0.051]
posterolateral_temporal_area	[-0.071, -0.05]	[-0.015, 0.007]	[0.001, 0.022]	[-0.014, 0.007]	[-0.007, 0.014]	[-0.033, -0.011]	[-0.014, 0.007]	[-0.021, 0]	[-0.009, 0.013]	[-0.017, 0.004]	[-0.012, 0.009]	[-0.015, 0.006]	[0.029, 0.05]
pars_opercularis_area	[-0.065, -0.044]	[-0.022, 0]	[-0.002, 0.02]	[-0.023, -0.002]	[-0.014, 0.007]	[-0.041, -0.02]	[-0.023, -0.002]	[-0.024, -0.003]	[-0.012, 0.009]	[-0.01, 0.012]	[-0.012, 0.009]	[-0.014, 0.007]	[0.032, 0.054]
orbitofrontal_area	[-0.064, -0.043]	[-0.013, 0.008]	[0.002, 0.024]	[-0.018, 0.004]	[-0.008, 0.013]	[-0.038, -0.017]	[-0.018, 0.004]	[-0.018, 0.003]	[-0.017, 0.005]	[-0.013, 0.008]	[-0.009, 0.013]	[-0.014, 0.008]	[0.034, 0.055]
occipital_area	[-0.054, -0.033]	[-0.027, -0.005]	[-0.008, 0.013]	[-0.019, 0.003]	[-0.008, 0.013]	[-0.034, -0.013]	[-0.019, 0.003]	[-0.021, 0]	[-0.006, 0.015]	[-0.002, 0.019]	[-0.002, 0.02]	[-0.011, 0.01]	[0.036, 0.057]
motor_premotor_area	[-0.055, -0.034]	[-0.016, 0.005]	[0.001, 0.022]	[-0.015, 0.006]	[-0.009, 0.012]	[-0.034, -0.012]	[-0.015, 0.006]	[-0.017, 0.004]	[-0.014, 0.007]	[-0.012, 0.009]	[-0.005, 0.016]	[-0.015, 0.006]	[0.031, 0.052]
inferior_parietal_area	[-0.067, -0.046]	[-0.022, -0.001]	[-0.001, 0.02]	[-0.02, 0.001]	[-0.007, 0.014]	[-0.039, -0.017]	[-0.02, 0.001]	[-0.02, 0.001]	[-0.009, 0.012]	[-0.014, 0.008]	[-0.016, 0.006]	[-0.01, 0.011]	[0.033, 0.054]
dorsomedial_frontal_area	[-0.06, -0.038]	[-0.015, 0.006]	[0.001, 0.022]	[-0.021, 0]	[-0.013, 0.009]	[-0.037, -0.016]	[-0.021, 0]	[-0.02, 0.001]	[-0.015, 0.007]	[-0.01, 0.011]	[-0.007, 0.014]	[-0.014, 0.008]	[0.032, 0.053]
dorsolateral_prefrontal_area	[-0.068, -0.047]	[-0.016, 0.005]	[-0.006, 0.015]	[-0.025, -0.003]	[-0.006, 0.016]	[-0.042, -0.021]	[-0.025, -0.003]	[-0.022, -0.001]	[-0.014, 0.007]	[-0.018, 0.003]	[-0.009, 0.012]	[-0.02, 0.001]	[0.037, 0.058]
anteromedial_temporal_area	[-0.066, -0.045]	[-0.027, -0.005]	[-0.008, 0.013]	[-0.024, -0.003]	[-0.01, 0.011]	[-0.036, -0.014]	[-0.024, -0.003]	[-0.017, 0.004]	[-0.011, 0.01]	[-0.009, 0.013]	[-0.013, 0.008]	[-0.013, 0.008]	[0.027, 0.048]
ventromedial_occipital_thickness	[-0.014, 0.008]	[-0.005, 0.017]	[-0.02, 0.001]	[-0.019, 0.003]	[-0.005, 0.016]	[-0.016, 0.005]	[-0.019, 0.003]	[-0.007, 0.014]	[-0.005, 0.016]	[-0.022, 0]	[-0.009, 0.012]	[-0.025, -0.004]	[-0.013, 0.008]
ventral_frontal_thickness	[0.009, 0.03]	[0.001, 0.022]	[-0.026, -0.005]	[-0.02, 0.001]	[-0.004, 0.017]	[-0.009, 0.013]	[-0.02, 0.001]	[-0.009, 0.013]	[-0.013, 0.008]	[-0.029, -0.008]	[-0.014, 0.008]	[-0.025, -0.004]	[-0.028, -0.007]
temporal_pole_thickness	[-0.011, 0.01]	[-0.003, 0.018]	[-0.021, 0.001]	[-0.03, -0.009]	[-0.009, 0.012]	[-0.021, 0.001]	[-0.03, -0.009]	[-0.018, 0.004]	[-0.009, 0.012]	[-0.028, -0.007]	[-0.016, 0.006]	[-0.027, -0.006]	[-0.013, 0.009]
superior_parietal_thickness	[-0.019, 0.002]	[-0.001, 0.02]	[-0.019, 0.002]	[-0.012, 0.009]	[-0.004, 0.017]	[-0.006, 0.015]	[-0.012, 0.009]	[-0.008, 0.014]	[-0.011, 0.01]	[-0.013, 0.008]	[-0.011, 0.01]	[-0.009, 0.012]	[-0.019, 0.003]
perisylvian_thickness	[-0.019, 0.002]	[-0.006, 0.015]	[-0.022, -0.001]	[-0.025, -0.004]	[0.002, 0.023]	[-0.016, 0.006]	[-0.025, -0.004]	[-0.002, 0.02]	[-0.005, 0.017]	[-0.023, -0.001]	[-0.016, 0.005]	[-0.019, 0.002]	[-0.009, 0.013]
occipital_thickness	[-0.008, 0.013]	[-0.001, 0.02]	[-0.022, 0]	[-0.015, 0.006]	[-0.005, 0.016]	[-0.004, 0.018]	[-0.015, 0.006]	[-0.008, 0.013]	[-0.004, 0.017]	[-0.021, 0.001]	[-0.01, 0.012]	[-0.016, 0.005]	[-0.016, 0.006]
motor_premotor_SMA_thickness	[-0.021, 0.001]	[-0.001, 0.02]	[-0.018, 0.003]	[-0.012, 0.009]	[0.005, 0.026]	[-0.007, 0.015]	[-0.012, 0.009]	[-0.004, 0.017]	[-0.005, 0.016]	[-0.02, 0.001]	[-0.014, 0.008]	[-0.011, 0.01]	[-0.023, -0.002]
middle_temporal_thickness	[-0.013, 0.009]	[-0.006, 0.015]	[-0.019, 0.002]	[-0.023, -0.001]	[-0.008, 0.013]	[-0.015, 0.006]	[-0.023, -0.001]	[-0.006, 0.015]	[-0.01, 0.011]	[-0.022, -0.001]	[-0.016, 0.005]	[-0.016, 0.005]	[-0.02, 0.001]
medial_temporal_thickness	[-0.007, 0.015]	[-0.005, 0.016]	[-0.022, 0]	[-0.019, 0.002]	[-0.006, 0.016]	[-0.013, 0.008]	[-0.019, 0.002]	[-0.013, 0.009]	[-0.009, 0.012]	[-0.023, -0.002]	[-0.011, 0.01]	[-0.025, -0.004]	[-0.024, -0.002]
medial_prefrontal_thickness	[0.001, 0.023]	[-0.002, 0.02]	[-0.02, 0.001]	[-0.011, 0.01]	[-0.003, 0.018]	[-0.006, 0.016]	[-0.011, 0.01]	[-0.003, 0.018]	[-0.011, 0.01]	[-0.014, 0.007]	[-0.018, 0.004]	[-0.014, 0.008]	[-0.021, 0]
inferior_parietal_thickness	[-0.007, 0.014]	[-0.003, 0.018]	[-0.024, -0.003]	[-0.017, 0.004]	[-0.002, 0.02]	[-0.007, 0.014]	[-0.017, 0.004]	[-0.006, 0.015]	[-0.018, 0.004]	[-0.02, 0.001]	[-0.012, 0.009]	[-0.017, 0.004]	[-0.022, -0.001]
dorsolateral_prefrontal_thickness	[-0.003, 0.018]	[-0.001, 0.02]	[-0.027, -0.006]	[-0.018, 0.003]	[-0.002, 0.019]	[-0.007, 0.015]	[-0.018, 0.003]	[-0.007, 0.015]	[-0.015, 0.007]	[-0.024, -0.002]	[-0.013, 0.008]	[-0.019, 0.003]	[-0.023, -0.002]
total_surface_area	[-0.07, -0.049]	[-0.02, 0.002]	[-0.001, 0.02]	[-0.02, 0.001]	[-0.008, 0.013]	[-0.04, -0.019]	[-0.02, 0.001]	[-0.021, 0]	[-0.012, 0.009]	[-0.012, 0.009]	[-0.008, 0.013]	[-0.014, 0.007]	[0.038, 0.06]
mean_thickness	[-0.013, 0.008]	[-0.002, 0.02]	[-0.023, -0.002]	[-0.02, 0.001]	[-0.001, 0.02]	[-0.011, 0.01]	[-0.02, 0.001]	[-0.007, 0.014]	[-0.01, 0.011]	[-0.025, -0.003]	[-0.014, 0.007]	[-0.021, 0]	[-0.02, 0.001]
p-value	ADHD	ASD	BPD	MDD	OCD	PTSD	SZ	TS	AD	ALS	EP	FTD	PD
superior_temporal_area	1.07768e-27	0.32197	0.14203	0.0053375	0.417141	3.55778e-05	0.0053375	0.276263	0.555448	0.842222	0.915726	0.717434	1.48462e-11
superior_parietal_area	1.10464e-14	0.343587	0.194528	0.93221	0.766492	0.000107099	0.93221	0.271781	0.526617	0.37024	0.297134	0.918245	4.65552e-14
precuneus_area	5.67929e-16	0.290111	0.144203	0.0363898	0.657262	7.49356e-05	0.0363898	0.149021	0.363394	0.436985	0.531155	0.788381	1.96222e-13
posterolateral_temporal_area	6.56784e-29	0.453455	0.0329105	0.505191	0.544678	5.5665e-05	0.505191	0.0524478	0.733635	0.254455	0.767048	0.401472	5.49118e-13
pars_opercularis_area	8.04551e-24	0.0401939	0.0977907	0.0219843	0.543087	1.96756e-08	0.0219843	0.0122441	0.744768	0.842915	0.737862	0.543337	2.15387e-15
orbitofrontal_area	7.19838e-23	0.610339	0.0165109	0.207212	0.642066	4.5211e-07	0.207212	0.168972	0.273282	0.62023	0.706778	0.59261	2.03041e-16
occipital_area	1.62791e-15	0.00338664	0.656186	0.142328	0.645873	1.38347e-05	0.142328	0.0573152	0.40244	0.117755	0.0968031	0.949178	1.57046e-17
motor_premotor_area	2.64617e-16	0.296146	0.0350922	0.416131	0.776768	2.42412e-05	0.416131	0.246428	0.530488	0.763897	0.293951	0.381218	1.41134e-14
inferior_parietal_area	2.51816e-25	0.0384998	0.0800748	0.0856715	0.542449	2.79213e-07	0.0856715	0.0709239	0.798917	0.596124	0.358767	0.90749	1.69212e-15
dorsomedial_frontal_area	2.20703e-19	0.421075	0.0401233	0.0499092	0.713302	1.077e-06	0.0499092	0.0814379	0.45101	0.902124	0.525026	0.563366	3.81603e-15
dorsolateral_prefrontal_area	6.08871e-26	0.343027	0.37828	0.00996354	0.35596	5.28635e-09	0.00996354	0.0393546	0.491252	0.164759	0.744734	0.0713643	2.43443e-18
anteromedial_temporal_area	2.052e-24	0.00322929	0.664361	0.012971	0.949719	3.81368e-06	0.012971	0.220952	0.87758	0.718354	0.675721	0.608557	3.33509e-12
ventromedial_occipital_thickness	0.590845	0.274063	0.0806389	0.139516	0.340223	0.326865	0.139516	0.485451	0.325186	0.0405425	0.808656	0.00640475	0.640282
ventral_frontal_thickness	0.000422358	0.0390958	0.00400482	0.0775173	0.22268	0.710887	0.0775173	0.728279	0.675516	0.00063631	0.575297	0.00828206	0.00151715
temporal_pole_thickness	0.924906	0.159506	0.0673284	0.000396005	0.823693	0.0631028	0.000396005	0.188822	0.735402	0.00124435	0.358708	0.00257468	0.733179
superior_parietal_thickness	0.116396	0.0721358	0.111017	0.773815	0.231712	0.372993	0.773815	0.599662	0.940946	0.659793	0.883214	0.813311	0.142113
perisylvian_thickness	0.105916	0.387647	0.0296252	0.00825667	0.02296	0.351868	0.00825667	0.0961871	0.268034	0.0280233	0.323705	0.120957	0.693515
occipital_thickness	0.62852	0.0865561	0.0442275	0.424033	0.340288	0.189734	0.424033	0.623485	0.239874	0.0670958	0.863947	0.300451	0.354135
motor_premotor_SMA_thickness	0.0638373	0.0914028	0.154507	0.793979	0.00521745	0.461217	0.793979	0.24696	0.305021	0.0880005	0.59693	0.891461	0.0212026
middle_temporal_thickness	0.733138	0.383273	0.114052	0.0288905	0.674647	0.441785	0.0288905	0.409779	0.977513	0.0401515	0.324485	0.316375	0.0794528
medial_temporal_thickness	0.455545	0.332149	0.0417882	0.107506	0.353583	0.618061	0.107506	0.731448	0.750149	0.0244273	0.952339	0.00883954	0.017632
medial_prefrontal_thickness	0.0288921	0.0948062	0.0774476	0.939499	0.172717	0.347938	0.939499	0.166765	0.889827	0.540162	0.193677	0.567476	0.0596966
inferior_parietal_thickness	0.517053	0.187748	0.0109119	0.241946	0.101116	0.558499	0.241946	0.407451	0.199217	0.0730505	0.742653	0.220492	0.0350144
dorsolateral_prefrontal_thickness	0.163498	0.0760696	0.00255143	0.151825	0.1285	0.468531	0.151825	0.476856	0.467851	0.0178499	0.639807	0.133934	0.0234608
total_surface_area	2.93208e-28	0.0983766	0.0827625	0.0718603	0.646369	6.82211e-08	0.0718603	0.0561002	0.78922	0.830804	0.663722	0.536002	1.98123e-19
mean_thickness	0.691013	0.0934148	0.0200094	0.0812219	0.0893936	0.94087	0.0812219	0.529498	0.920688	0.0104728	0.490567	0.0546691	0.0778447

## Sheet: S3
Table S3. Results of cortical morphology-PRS association (controlled for global effects) analysis. (Chen atlas)
beta	ADHD	ASD	BPD	MDD	OCD	PTSD	SZ	TS	AD	ALS	EP	FTD	PD
superior_temporal_area	-0.0129605	0.0055717	-0.00109373	-0.0143596	0.00507649	0.00710514	-0.0143596	0.00656811	-0.00351293	0.000584033	-0.00605772	0.0018178	-0.013951
superior_parietal_area	0.0126784	0.0044047	-0.000886486	0.0152105	-0.00135409	0.0050552	0.0152105	0.00504095	-0.00366291	-0.0069809	0.00671805	0.00346971	0.000650717
precuneus_area	0.0185486	0.00551286	0.00125263	-0.00449288	0.000691326	0.00956884	-0.00449288	0.00329417	-0.00736996	0.0110392	0.00314821	0.00832039	-0.00749105
posterolateral_temporal_area	-0.019057	0.00591632	0.0067719	0.00848754	0.00205373	0.00493041	0.00848754	-0.00337363	0.00545494	-0.00929622	-0.00643951	-0.00304582	-0.00334915
pars_opercularis_area	-0.00262837	-0.00645586	0.00160051	-0.00830036	-0.0118709	-0.00986665	-0.00830036	-0.00996719	-0.000727803	0.00435108	-0.00828788	-0.000713567	-0.000981696
orbitofrontal_area	0.00385653	0.0134483	0.0111504	0.00541265	0.000873986	-0.00100842	0.00541265	0.0052516	-0.0110471	-0.00412993	-0.00030521	0.000336557	-0.000574561
occipital_area	0.00944818	-0.0149636	-0.00920301	-0.000271359	0.00051603	0.00041738	-0.000271359	-0.00343117	0.0099419	0.0158308	0.0124831	0.00408711	0.0111074
motor_premotor_area	0.0087391	0.00313467	0.00641199	0.00664541	-0.000211727	0.00198548	0.00664541	0.00425626	-0.00357589	-0.00196256	0.00600503	-0.00366221	0.00255235
inferior_parietal_area	-0.0108373	-0.00668591	0.00289502	-0.000968887	0.00195105	-0.0055518	-0.000968887	-0.00223582	0.00516667	-0.00361103	-0.012987	0.00606117	0.00332219
dorsomedial_frontal_area	0.0137994	0.00959259	0.00610362	-0.00394836	-0.00993752	-0.000148525	-0.00394836	-0.000514187	-0.00649579	0.004016	0.0025903	-0.000677664	-0.00466874
dorsolateral_prefrontal_area	-0.00637359	0.00738495	-0.00848149	-0.0115766	0.00683884	-0.0124199	-0.0115766	-0.00416636	-0.0052496	-0.0153413	-0.000973041	-0.0158232	0.00772398
anteromedial_temporal_area	-0.00836477	-0.0161534	-0.0115259	-0.00973269	-0.00345306	0.000101307	-0.00973269	0.00392246	0.00108354	0.00616098	-0.00796498	0.000286445	-0.00780161
ventromedial_occipital_thickness	-0.00190231	-0.00178951	0.00030426	-0.0010401	-0.0029651	-0.0077977	-0.0010401	0.00181612	0.00793712	-0.000982411	0.00662538	-0.0107516	0.00713454
ventral_frontal_thickness	0.0290008	0.00674326	-0.00980002	-0.00422824	-0.000365325	0.00390338	-0.00422824	-0.000904327	-0.00389699	-0.0125491	-0.000771099	-0.0106218	-0.0153897
temporal_pole_thickness	0.00170637	0.00143206	-0.00133231	-0.0180524	-0.0079607	-0.0143511	-0.0180524	-0.0138846	0.00208167	-0.010923	-0.00337565	-0.0130681	0.00725697
superior_parietal_thickness	-0.011204	0.00346387	0.00161075	0.00968939	-0.00121875	0.00841206	0.00968939	0.000263467	-0.00188887	0.0146572	0.0033871	0.0149368	-0.000125582
perisylvian_thickness	-0.0143713	-0.00709177	-0.00203996	-0.0124483	0.00857145	-0.00963711	-0.0124483	0.0124574	0.0115508	1.83582e-05	-0.00431972	0.00162824	0.0221114
occipital_thickness	0.00838888	0.00289219	-0.000586725	0.00687151	-0.00475866	0.0140173	0.00687151	-0.000370205	0.0113851	0.00272889	0.00754809	0.00585741	0.00491096
motor_premotor_SMA_thickness	-0.0150959	0.00279435	0.00516347	0.0120268	0.014732	0.00823571	0.0120268	0.00624903	0.00909646	0.0051242	-4.56e-06	0.0153737	-0.0083001
middle_temporal_thickness	-0.000133189	-0.00515763	0.0031953	-0.00720323	-0.00962168	-0.00662195	-0.00720323	0.00304509	-0.000606803	0.000568682	-0.00384406	0.00581379	-0.00308949
medial_temporal_thickness	0.00792205	-0.00133968	-0.00321702	-0.00300971	-0.00204266	-0.00343709	-0.00300971	-0.00588581	0.00206511	-0.00373026	0.0030457	-0.00976921	-0.00897042
medial_prefrontal_thickness	0.0211531	0.00334309	0.0001771	0.0105968	0.000404112	0.00869281	0.0105968	0.00777099	-0.0014879	0.0111445	-0.00670232	0.00721701	-0.00468746
inferior_parietal_thickness	0.0116123	-0.00221242	-0.00600329	0.00432238	0.0024048	0.00838083	0.00432238	0.00291391	-0.0162713	0.00575276	0.00266284	0.00557199	-0.00608685
dorsolateral_prefrontal_thickness	0.0173534	0.00342961	-0.00997079	0.000502437	0.000693252	0.00805966	0.000502437	0.00171336	-0.00831741	-0.00230051	0.00106851	0.00106765	-0.00819629
total_surface_area	-0.0598561	-0.00898192	0.00942808	-0.00978198	0.00249344	-0.0293174	-0.00978198	-0.0103811	-0.00145278	-0.0011612	0.00236283	-0.00336327	0.0489594
mean_thickness	-0.00216013	0.00911711	-0.0126412	-0.00947569	0.00923097	-0.000403119	-0.00947569	0.00341709	0.000541101	-0.0139108	-0.00374661	-0.0104422	-0.0095827
Conf. Interval (95%, round up)	ADHD	ASD	BPD	MDD	OCD	PTSD	SZ	TS	AD	ALS	EP	FTD	PD
superior_temporal_area	[-0.024, -0.002]	[-0.005, 0.016]	[-0.012, 0.01]	[-0.025, -0.004]	[-0.006, 0.016]	[-0.004, 0.018]	[-0.025, -0.004]	[-0.004, 0.017]	[-0.014, 0.007]	[-0.01, 0.011]	[-0.017, 0.005]	[-0.009, 0.012]	[-0.025, -0.003]
superior_parietal_area	[0.002, 0.023]	[-0.006, 0.015]	[-0.012, 0.01]	[0.005, 0.026]	[-0.012, 0.009]	[-0.006, 0.016]	[0.005, 0.026]	[-0.006, 0.016]	[-0.014, 0.007]	[-0.018, 0.004]	[-0.004, 0.017]	[-0.007, 0.014]	[-0.01, 0.011]
precuneus_area	[0.008, 0.029]	[-0.005, 0.016]	[-0.009, 0.012]	[-0.015, 0.006]	[-0.01, 0.011]	[-0.001, 0.02]	[-0.015, 0.006]	[-0.007, 0.014]	[-0.018, 0.003]	[0, 0.022]	[-0.008, 0.014]	[-0.002, 0.019]	[-0.018, 0.003]
posterolateral_temporal_area	[-0.03, -0.008]	[-0.005, 0.017]	[-0.004, 0.017]	[-0.002, 0.019]	[-0.009, 0.013]	[-0.006, 0.016]	[-0.002, 0.019]	[-0.014, 0.007]	[-0.005, 0.016]	[-0.02, 0.001]	[-0.017, 0.004]	[-0.014, 0.008]	[-0.014, 0.007]
pars_opercularis_area	[-0.013, 0.008]	[-0.017, 0.004]	[-0.009, 0.012]	[-0.019, 0.002]	[-0.023, -0.001]	[-0.021, 0.001]	[-0.019, 0.002]	[-0.021, 0.001]	[-0.011, 0.01]	[-0.006, 0.015]	[-0.019, 0.002]	[-0.011, 0.01]	[-0.012, 0.01]
orbitofrontal_area	[-0.007, 0.015]	[0.003, 0.024]	[0, 0.022]	[-0.005, 0.016]	[-0.01, 0.012]	[-0.012, 0.01]	[-0.005, 0.016]	[-0.005, 0.016]	[-0.022, 0]	[-0.015, 0.007]	[-0.011, 0.01]	[-0.01, 0.011]	[-0.011, 0.01]
occipital_area	[-0.001, 0.02]	[-0.026, -0.004]	[-0.02, 0.001]	[-0.011, 0.01]	[-0.01, 0.011]	[-0.01, 0.011]	[-0.011, 0.01]	[-0.014, 0.007]	[-0.001, 0.021]	[0.005, 0.026]	[0.002, 0.023]	[-0.007, 0.015]	[0, 0.022]
motor_premotor_area	[-0.002, 0.019]	[-0.008, 0.014]	[-0.004, 0.017]	[-0.004, 0.017]	[-0.011, 0.01]	[-0.009, 0.013]	[-0.004, 0.017]	[-0.006, 0.015]	[-0.014, 0.007]	[-0.013, 0.009]	[-0.005, 0.017]	[-0.014, 0.007]	[-0.008, 0.013]
inferior_parietal_area	[-0.021, 0]	[-0.017, 0.004]	[-0.008, 0.014]	[-0.012, 0.01]	[-0.009, 0.013]	[-0.016, 0.005]	[-0.012, 0.01]	[-0.013, 0.008]	[-0.005, 0.016]	[-0.014, 0.007]	[-0.024, -0.002]	[-0.005, 0.017]	[-0.007, 0.014]
dorsomedial_frontal_area	[0.003, 0.024]	[-0.001, 0.02]	[-0.005, 0.017]	[-0.015, 0.007]	[-0.021, 0.001]	[-0.011, 0.011]	[-0.015, 0.007]	[-0.011, 0.01]	[-0.017, 0.004]	[-0.007, 0.015]	[-0.008, 0.013]	[-0.011, 0.01]	[-0.015, 0.006]
dorsolateral_prefrontal_area	[-0.017, 0.004]	[-0.003, 0.018]	[-0.019, 0.002]	[-0.022, -0.001]	[-0.004, 0.017]	[-0.023, -0.002]	[-0.022, -0.001]	[-0.015, 0.006]	[-0.016, 0.005]	[-0.026, -0.005]	[-0.012, 0.01]	[-0.026, -0.005]	[-0.003, 0.018]
anteromedial_temporal_area	[-0.019, 0.002]	[-0.027, -0.006]	[-0.022, -0.001]	[-0.02, 0.001]	[-0.014, 0.007]	[-0.011, 0.011]	[-0.02, 0.001]	[-0.007, 0.015]	[-0.01, 0.012]	[-0.004, 0.017]	[-0.019, 0.003]	[-0.01, 0.011]	[-0.018, 0.003]
ventromedial_occipital_thickness	[-0.013, 0.009]	[-0.012, 0.009]	[-0.01, 0.011]	[-0.012, 0.01]	[-0.014, 0.008]	[-0.018, 0.003]	[-0.012, 0.01]	[-0.009, 0.012]	[-0.003, 0.019]	[-0.012, 0.01]	[-0.004, 0.017]	[-0.021, 0]	[-0.004, 0.018]
ventral_frontal_thickness	[0.018, 0.04]	[-0.004, 0.017]	[-0.02, 0.001]	[-0.015, 0.006]	[-0.011, 0.01]	[-0.007, 0.015]	[-0.015, 0.006]	[-0.012, 0.01]	[-0.015, 0.007]	[-0.023, -0.002]	[-0.011, 0.01]	[-0.021, 0]	[-0.026, -0.005]
temporal_pole_thickness	[-0.009, 0.012]	[-0.009, 0.012]	[-0.012, 0.009]	[-0.029, -0.007]	[-0.019, 0.003]	[-0.025, -0.004]	[-0.029, -0.007]	[-0.025, -0.003]	[-0.009, 0.013]	[-0.022, 0]	[-0.014, 0.007]	[-0.024, -0.002]	[-0.003, 0.018]
superior_parietal_thickness	[-0.022, -0.001]	[-0.007, 0.014]	[-0.009, 0.012]	[-0.001, 0.02]	[-0.012, 0.009]	[-0.002, 0.019]	[-0.001, 0.02]	[-0.01, 0.011]	[-0.013, 0.009]	[0.004, 0.025]	[-0.007, 0.014]	[0.004, 0.026]	[-0.011, 0.011]
perisylvian_thickness	[-0.025, -0.004]	[-0.018, 0.004]	[-0.013, 0.009]	[-0.023, -0.002]	[-0.002, 0.019]	[-0.02, 0.001]	[-0.023, -0.002]	[0.002, 0.023]	[0.001, 0.022]	[-0.011, 0.011]	[-0.015, 0.006]	[-0.009, 0.012]	[0.011, 0.033]
occipital_thickness	[-0.002, 0.019]	[-0.008, 0.014]	[-0.011, 0.01]	[-0.004, 0.018]	[-0.015, 0.006]	[0.003, 0.025]	[-0.004, 0.018]	[-0.011, 0.01]	[0.001, 0.022]	[-0.008, 0.013]	[-0.003, 0.018]	[-0.005, 0.017]	[-0.006, 0.016]
motor_premotor_SMA_thickness	[-0.026, -0.004]	[-0.008, 0.013]	[-0.005, 0.016]	[0.001, 0.023]	[0.004, 0.025]	[-0.002, 0.019]	[0.001, 0.023]	[-0.004, 0.017]	[-0.002, 0.02]	[-0.006, 0.016]	[-0.011, 0.011]	[0.005, 0.026]	[-0.019, 0.002]
middle_temporal_thickness	[-0.011, 0.011]	[-0.016, 0.005]	[-0.007, 0.014]	[-0.018, 0.003]	[-0.02, 0.001]	[-0.017, 0.004]	[-0.018, 0.003]	[-0.008, 0.014]	[-0.011, 0.01]	[-0.01, 0.011]	[-0.014, 0.007]	[-0.005, 0.016]	[-0.014, 0.008]
medial_temporal_thickness	[-0.003, 0.019]	[-0.012, 0.009]	[-0.014, 0.007]	[-0.014, 0.008]	[-0.013, 0.009]	[-0.014, 0.007]	[-0.014, 0.008]	[-0.017, 0.005]	[-0.009, 0.013]	[-0.014, 0.007]	[-0.008, 0.014]	[-0.02, 0.001]	[-0.02, 0.002]
medial_prefrontal_thickness	[0.011, 0.032]	[-0.007, 0.014]	[-0.01, 0.011]	[0, 0.021]	[-0.01, 0.011]	[-0.002, 0.019]	[0, 0.021]	[-0.003, 0.018]	[-0.012, 0.009]	[0, 0.022]	[-0.017, 0.004]	[-0.003, 0.018]	[-0.015, 0.006]
inferior_parietal_thickness	[0.001, 0.022]	[-0.013, 0.008]	[-0.017, 0.005]	[-0.006, 0.015]	[-0.008, 0.013]	[-0.002, 0.019]	[-0.006, 0.015]	[-0.008, 0.014]	[-0.027, -0.006]	[-0.005, 0.016]	[-0.008, 0.013]	[-0.005, 0.016]	[-0.017, 0.005]
dorsolateral_prefrontal_thickness	[0.007, 0.028]	[-0.007, 0.014]	[-0.021, 0.001]	[-0.01, 0.011]	[-0.01, 0.011]	[-0.003, 0.019]	[-0.01, 0.011]	[-0.009, 0.012]	[-0.019, 0.002]	[-0.013, 0.008]	[-0.01, 0.012]	[-0.01, 0.012]	[-0.019, 0.002]
total_surface_area	[-0.07, -0.049]	[-0.02, 0.002]	[-0.001, 0.02]	[-0.02, 0.001]	[-0.008, 0.013]	[-0.04, -0.019]	[-0.02, 0.001]	[-0.021, 0]	[-0.012, 0.009]	[-0.012, 0.009]	[-0.008, 0.013]	[-0.014, 0.007]	[0.038, 0.06]
mean_thickness	[-0.013, 0.008]	[-0.002, 0.02]	[-0.023, -0.002]	[-0.02, 0.001]	[-0.001, 0.02]	[-0.011, 0.01]	[-0.02, 0.001]	[-0.007, 0.014]	[-0.01, 0.011]	[-0.025, -0.003]	[-0.014, 0.007]	[-0.021, 0]	[-0.02, 0.001]
p-value	ADHD	ASD	BPD	MDD	OCD	PTSD	SZ	TS	AD	ALS	EP	FTD	PD
superior_temporal_area	0.017082	0.305248	0.8405	0.00823189	0.350242	0.191071	0.00823189	0.226818	0.518015	0.914419	0.264989	0.738011	0.0102518
superior_parietal_area	0.0196472	0.417652	0.870424	0.00512594	0.803235	0.352266	0.00512594	0.353626	0.500308	0.198948	0.216389	0.523177	0.904692
precuneus_area	0.000641628	0.310384	0.817708	0.408391	0.898775	0.0782756	0.408391	0.544412	0.175052	0.0422184	0.562389	0.125759	0.168071
posterolateral_temporal_area	0.000453276	0.276305	0.212729	0.118335	0.705503	0.364281	0.118335	0.534747	0.315495	0.0871525	0.236045	0.575169	0.537716
pars_opercularis_area	0.628641	0.234857	0.768371	0.126673	0.0289315	0.0694343	0.126673	0.0666414	0.893465	0.423343	0.127244	0.895537	0.85665
orbitofrontal_area	0.477931	0.0133345	0.040186	0.319261	0.872235	0.852792	0.319261	0.333874	0.0420709	0.447289	0.955214	0.950619	0.915802
occipital_area	0.0821091	0.00589503	0.0903678	0.960176	0.924352	0.938782	0.960176	0.527803	0.0673352	0.00357778	0.0216142	0.452013	0.0409628
motor_premotor_area	0.107815	0.564072	0.238053	0.221398	0.968923	0.714855	0.221398	0.433517	0.510543	0.718005	0.269168	0.50039	0.638603
inferior_parietal_area	0.0461291	0.218595	0.594236	0.858501	0.719588	0.306979	0.858501	0.680773	0.34175	0.506396	0.0168575	0.264717	0.540994
dorsomedial_frontal_area	0.0111068	0.0775384	0.261385	0.467513	0.0674557	0.978197	0.467513	0.924621	0.231975	0.45992	0.633621	0.900765	0.390292
dorsolateral_prefrontal_area	0.240876	0.174176	0.118598	0.0331502	0.208242	0.022287	0.0331502	0.443292	0.334058	0.00475646	0.857901	0.00359387	0.155231
anteromedial_temporal_area	0.123753	0.0029534	0.0339288	0.0733043	0.525173	0.985127	0.0733043	0.470438	0.841965	0.256929	0.142746	0.957965	0.151123
ventromedial_occipital_thickness	0.726309	0.741941	0.955353	0.848222	0.58534	0.151328	0.848222	0.738243	0.144149	0.856547	0.222793	0.0478808	0.189241
ventral_frontal_thickness	9.42443e-08	0.21467	0.0713375	0.43655	0.946405	0.472601	0.43655	0.86784	0.473326	0.0209312	0.887168	0.0506355	0.00462582
temporal_pole_thickness	0.753533	0.792157	0.806337	0.000893596	0.142961	0.00826988	0.000893596	0.0106189	0.701687	0.0444335	0.534503	0.0161844	0.18176
superior_parietal_thickness	0.0392379	0.523877	0.766932	0.0745921	0.822555	0.121644	0.0745921	0.961334	0.728165	0.00699292	0.533117	0.00598433	0.981564
perisylvian_thickness	0.00817941	0.191908	0.707386	0.0219829	0.11474	0.0761717	0.0219829	0.0218856	0.0335438	0.997305	0.426692	0.764476	4.71805e-05
occipital_thickness	0.122674	0.594597	0.914026	0.206077	0.381228	0.00989697	0.206077	0.94569	0.0361705	0.615571	0.164855	0.281115	0.366176
motor_premotor_SMA_thickness	0.00547093	0.607124	0.342049	0.0268907	0.00670904	0.129656	0.0268907	0.250193	0.0941594	0.345733	0.999331	0.00466874	0.126684
middle_temporal_thickness	0.980448	0.342595	0.556559	0.185017	0.0766432	0.223033	0.185017	0.57526	0.911096	0.91666	0.479355	0.284713	0.569701
medial_temporal_thickness	0.144912	0.805286	0.553879	0.579708	0.707016	0.527091	0.579708	0.278789	0.703948	0.492461	0.575183	0.0722322	0.0988082
medial_prefrontal_thickness	9.91101e-05	0.538452	0.974003	0.0511823	0.940724	0.109693	0.0511823	0.152733	0.78425	0.0402921	0.217467	0.184177	0.388394
inferior_parietal_thickness	0.0326129	0.683933	0.269306	0.426407	0.658126	0.123034	0.426407	0.591833	0.00275131	0.2898	0.624145	0.305223	0.262698
dorsolateral_prefrontal_thickness	0.00140611	0.527991	0.066543	0.926339	0.898494	0.138058	0.926339	0.752556	0.125894	0.672067	0.84413	0.844253	0.131502
total_surface_area	2.93208e-28	0.0983766	0.0827625	0.0718603	0.646369	6.82211e-08	0.0718603	0.0561002	0.78922	0.830804	0.663722	0.536002	1.98123e-19
mean_thickness	0.691013	0.0934148	0.0200094	0.0812219	0.0893936	0.94087	0.0812219	0.529498	0.920688	0.0104728	0.490567	0.0546691	0.0778447

## Sheet: S4
Table S4. Results of Subsetted Subcortical morphology-PRS association analysis. (Aseg atlas)
beta	ADHD	ASD	BPD	MDD	OCD	PTSD	SZ	TS	AD	ALS	EP	FTD	PD
thalamus	-0.0376069	-0.00610404	-0.00304641	-0.0110825	0.00553336	-0.0173031	-0.0110825	-0.00483062	-0.0186494	0.00263138	-0.00177945	0.00279085	0.0358863
caudate	-0.0341148	-0.00332733	0.0074724	-0.00283176	0.00902153	0.00126979	-0.00283176	-0.00264508	-0.0138793	-0.00896586	0.00334697	0.00493475	0.040055
pallidum	-0.0328353	-0.00141418	-0.00489214	-0.00521076	0.0129354	-0.00115063	-0.00521076	0.00260517	-0.000108262	-0.0104999	-0.000905826	0.00455115	0.0277691
putamen	-0.0241007	-0.00234184	0.00144155	-0.000459967	0.0121292	0.00833544	-0.000459967	-0.00216576	-0.0105234	-0.0111176	0.0065527	0.00293982	0.0363472
hippocampus	-0.0165691	-0.00841228	0.000835525	-0.010644	0.000557417	-0.00402936	-0.010644	-0.00129218	-0.0201833	-0.0165803	0.0157109	-0.00725574	0.0247314
amygdala	-0.0245094	-0.00135291	0.00353006	-0.00334746	0.00010814	0.00168156	-0.00334746	-0.0034148	-0.0079813	-0.012658	0.00558885	0.00139648	0.027676
accumbens	0.00404434	0.00207102	-0.0044729	-0.0115386	0.0166204	-0.00207055	-0.0115386	0.00100449	-0.0135677	-0.000257652	0.00274625	0.00591841	0.0188387
lateral_ventricle	-0.0327837	0.00972786	0.0135241	0.00702857	0.000969472	0.00364772	0.00702857	-0.00352754	0.0132305	-0.00977244	0.00278871	0.00438409	0.0217802
intracranial_volume	-0.0511061	-0.0033475	0.00434139	-0.0145946	0.010334	-0.0191503	-0.0145946	-0.0109755	0.00166638	-0.00979957	-0.000898779	-0.000585178	0.0511592
Conf. Interval (95%, round up)	ADHD	ASD	BPD	MDD	OCD	PTSD	SZ	TS	AD	ALS	EP	FTD	PD
thalamus	[-0.048, -0.027]	[-0.017, 0.005]	[-0.014, 0.008]	[-0.022, 0]	[-0.005, 0.016]	[-0.028, -0.007]	[-0.022, 0]	[-0.015, 0.006]	[-0.029, -0.008]	[-0.008, 0.013]	[-0.012, 0.009]	[-0.008, 0.013]	[0.025, 0.047]
caudate	[-0.045, -0.023]	[-0.014, 0.007]	[-0.003, 0.018]	[-0.013, 0.008]	[-0.002, 0.02]	[-0.009, 0.012]	[-0.013, 0.008]	[-0.013, 0.008]	[-0.025, -0.003]	[-0.02, 0.002]	[-0.007, 0.014]	[-0.006, 0.016]	[0.029, 0.051]
pallidum	[-0.043, -0.022]	[-0.012, 0.009]	[-0.016, 0.006]	[-0.016, 0.005]	[0.002, 0.024]	[-0.012, 0.01]	[-0.016, 0.005]	[-0.008, 0.013]	[-0.011, 0.011]	[-0.021, 0]	[-0.012, 0.01]	[-0.006, 0.015]	[0.017, 0.038]
putamen	[-0.035, -0.013]	[-0.013, 0.008]	[-0.009, 0.012]	[-0.011, 0.01]	[0.001, 0.023]	[-0.002, 0.019]	[-0.011, 0.01]	[-0.013, 0.008]	[-0.021, 0]	[-0.022, 0]	[-0.004, 0.017]	[-0.008, 0.014]	[0.026, 0.047]
hippocampus	[-0.027, -0.006]	[-0.019, 0.002]	[-0.01, 0.011]	[-0.021, 0]	[-0.01, 0.011]	[-0.015, 0.007]	[-0.021, 0]	[-0.012, 0.009]	[-0.031, -0.01]	[-0.027, -0.006]	[0.005, 0.026]	[-0.018, 0.003]	[0.014, 0.035]
amygdala	[-0.035, -0.014]	[-0.012, 0.009]	[-0.007, 0.014]	[-0.014, 0.007]	[-0.011, 0.011]	[-0.009, 0.012]	[-0.014, 0.007]	[-0.014, 0.007]	[-0.019, 0.003]	[-0.023, -0.002]	[-0.005, 0.016]	[-0.009, 0.012]	[0.017, 0.038]
accumbens	[-0.007, 0.015]	[-0.009, 0.013]	[-0.015, 0.006]	[-0.022, -0.001]	[0.006, 0.027]	[-0.013, 0.009]	[-0.022, -0.001]	[-0.01, 0.012]	[-0.024, -0.003]	[-0.011, 0.01]	[-0.008, 0.013]	[-0.005, 0.017]	[0.008, 0.029]
lateral_ventricle	[-0.043, -0.022]	[-0.001, 0.02]	[0.003, 0.024]	[-0.004, 0.018]	[-0.01, 0.012]	[-0.007, 0.014]	[-0.004, 0.018]	[-0.014, 0.007]	[0.003, 0.024]	[-0.02, 0.001]	[-0.008, 0.013]	[-0.006, 0.015]	[0.011, 0.032]
intracranial_volume	[-0.062, -0.04]	[-0.014, 0.007]	[-0.006, 0.015]	[-0.025, -0.004]	[0, 0.021]	[-0.03, -0.008]	[-0.025, -0.004]	[-0.022, 0]	[-0.009, 0.012]	[-0.02, 0.001]	[-0.012, 0.01]	[-0.011, 0.01]	[0.041, 0.062]
p-value	ADHD	ASD	BPD	MDD	OCD	PTSD	SZ	TS	AD	ALS	EP	FTD	PD
thalamus	4.42689e-12	0.261136	0.575104	0.0413809	0.308352	0.00146129	0.0413809	0.373838	0.00059581	0.628086	0.74322	0.607412	3.87942e-11
caudate	3.45506e-10	0.540362	0.16933	0.602416	0.0968853	0.815442	0.602416	0.626445	0.0106471	0.0989699	0.537959	0.363852	1.66019e-13
pallidum	1.52188e-09	0.794667	0.36818	0.337714	0.0172786	0.832472	0.337714	0.631618	0.984104	0.0533101	0.8676	0.402276	3.19604e-07
putamen	9.27043e-06	0.666535	0.790915	0.93257	0.0256165	0.125479	0.93257	0.690247	0.0528172	0.0407792	0.227903	0.588551	2.2263e-11
hippocampus	0.00229084	0.12141	0.877798	0.0500811	0.918253	0.458629	0.0500811	0.811942	0.00020198	0.00226575	0.00381653	0.181573	5.25649e-06
amygdala	6.52089e-06	0.803405	0.516184	0.538039	0.984124	0.757251	0.538039	0.529769	0.141932	0.0198454	0.303752	0.797211	3.51328e-07
accumbens	0.456956	0.703153	0.410723	0.0337897	0.00222473	0.703513	0.0337897	0.853362	0.0125393	0.962188	0.613328	0.276158	0.000526928
lateral_ventricle	1.61676e-09	0.0734194	0.0128574	0.195979	0.858398	0.502493	0.195979	0.516224	0.0148972	0.0721069	0.607802	0.419791	6.10629e-05
intracranial_volume	5.13479e-21	0.537915	0.424596	0.0072544	0.0572159	0.000430809	0.0072544	0.0434143	0.759125	0.0713459	0.868638	0.914252	4.50782e-21
Results of All Subcortical morphology-PRS association analysis. (Aseg atlas)
beta	ADHD	ASD	BPD	MDD	OCD	PTSD	SZ	TS	AD	ALS	EP	FTD	PD
brainstem	-0.0461651	-0.00618119	-0.0163226	-0.019792	-0.00288558	-0.0139834	-0.019792	-0.0109037	-0.00484659	-0.0045943	-0.00718067	0.00311199	0.036786
thalamus	-0.0376069	-0.00610404	-0.00304641	-0.0110825	0.00553336	-0.0173031	-0.0110825	-0.00483062	-0.0186494	0.00263138	-0.00177945	0.00279085	0.0358863
cerebellum_cortex	-0.0384365	-0.0160848	-0.0178628	-0.0163361	-0.00141165	-0.0241943	-0.0163361	-0.0148262	0.00834961	0.000226019	-0.00536867	0.0033414	0.0241384
cerebellum_white_matter	-0.0349663	-0.0157732	-0.0225177	-0.0296955	-0.0070484	-0.0101127	-0.0296955	-0.0151803	-0.00765613	-0.00183082	-0.00702243	0.000260796	0.0262126
caudate	-0.0341148	-0.00332733	0.0074724	-0.00283176	0.00902153	0.00126979	-0.00283176	-0.00264508	-0.0138793	-0.00896586	0.00334697	0.00493475	0.040055
pallidum	-0.0328353	-0.00141418	-0.00489214	-0.00521076	0.0129354	-0.00115063	-0.00521076	0.00260517	-0.000108262	-0.0104999	-0.000905826	0.00455115	0.0277691
putamen	-0.0241007	-0.00234184	0.00144155	-0.000459967	0.0121292	0.00833544	-0.000459967	-0.00216576	-0.0105234	-0.0111176	0.0065527	0.00293982	0.0363472
hippocampus	-0.0165691	-0.00841228	0.000835525	-0.010644	0.000557417	-0.00402936	-0.010644	-0.00129218	-0.0201833	-0.0165803	0.0157109	-0.00725574	0.0247314
amygdala	-0.0245094	-0.00135291	0.00353006	-0.00334746	0.00010814	0.00168156	-0.00334746	-0.0034148	-0.0079813	-0.012658	0.00558885	0.00139648	0.027676
ventral_diencephalon	-0.0474125	-0.000992422	-0.00833339	-0.0265729	0.00550208	-0.0147841	-0.0265729	-0.00904881	-0.00769286	-0.0116444	-0.00806987	0.00456972	0.0381251
lateral_ventricle	-0.0327837	0.00972786	0.0135241	0.00702857	0.000969472	0.00364772	0.00702857	-0.00352754	0.0132305	-0.00977244	0.00278871	0.00438409	0.0217802
inferior_lateral_ventricle	-0.0152066	0.0105966	0.0173239	0.0121207	0.00716773	0.00392089	0.0121207	-0.00530344	0.0143952	-0.00173732	-0.00135309	0.0117202	0.0195467
3rd_ventricle	-0.0193795	0.007668	0.0137462	-0.00236149	0.00890196	0.00370712	-0.00236149	-0.0131333	0.00253172	-0.0107193	-0.00446516	0.00741383	0.0221039
4th_ventricle	-0.0297644	0.00788941	0.00303151	0.000248764	-0.00104505	-0.0121296	0.000248764	-0.00238675	0.00681432	-0.0167594	-0.00600068	0.0127059	0.00823859
CSF	-0.0241531	0.00724692	0.00564347	0.000383698	0.00491528	-0.00225823	0.000383698	-0.0165976	0.0045864	-0.0108315	-0.000292359	0.0067978	0.0237334
accumbens	0.00404434	0.00207102	-0.0044729	-0.0115386	0.0166204	-0.00207055	-0.0115386	0.00100449	-0.0135677	-0.000257652	0.00274625	0.00591841	0.0188387
intracranial_volume	-0.0511061	-0.0033475	0.00434139	-0.0145946	0.010334	-0.0191503	-0.0145946	-0.0109755	0.00166638	-0.00979957	-0.000898779	-0.000585178	0.0511592
Conf. Interval (95%, round up)	ADHD	ASD	BPD	MDD	OCD	PTSD	SZ	TS	AD	ALS	EP	FTD	PD
brainstem	[-0.057, -0.036]	[-0.017, 0.004]	[-0.027, -0.006]	[-0.03, -0.009]	[-0.014, 0.008]	[-0.025, -0.003]	[-0.03, -0.009]	[-0.022, 0]	[-0.015, 0.006]	[-0.015, 0.006]	[-0.018, 0.003]	[-0.008, 0.014]	[0.026, 0.047]
thalamus	[-0.048, -0.027]	[-0.017, 0.005]	[-0.014, 0.008]	[-0.022, 0]	[-0.005, 0.016]	[-0.028, -0.007]	[-0.022, 0]	[-0.015, 0.006]	[-0.029, -0.008]	[-0.008, 0.013]	[-0.012, 0.009]	[-0.008, 0.013]	[0.025, 0.047]
cerebellum_cortex	[-0.049, -0.028]	[-0.027, -0.005]	[-0.029, -0.007]	[-0.027, -0.006]	[-0.012, 0.009]	[-0.035, -0.014]	[-0.027, -0.006]	[-0.025, -0.004]	[-0.002, 0.019]	[-0.01, 0.011]	[-0.016, 0.005]	[-0.007, 0.014]	[0.013, 0.035]
cerebellum_white_matter	[-0.046, -0.024]	[-0.026, -0.005]	[-0.033, -0.012]	[-0.04, -0.019]	[-0.018, 0.004]	[-0.021, 0.001]	[-0.04, -0.019]	[-0.026, -0.005]	[-0.018, 0.003]	[-0.012, 0.009]	[-0.018, 0.004]	[-0.01, 0.011]	[0.016, 0.037]
caudate	[-0.045, -0.023]	[-0.014, 0.007]	[-0.003, 0.018]	[-0.013, 0.008]	[-0.002, 0.02]	[-0.009, 0.012]	[-0.013, 0.008]	[-0.013, 0.008]	[-0.025, -0.003]	[-0.02, 0.002]	[-0.007, 0.014]	[-0.006, 0.016]	[0.029, 0.051]
pallidum	[-0.043, -0.022]	[-0.012, 0.009]	[-0.016, 0.006]	[-0.016, 0.005]	[0.002, 0.024]	[-0.012, 0.01]	[-0.016, 0.005]	[-0.008, 0.013]	[-0.011, 0.011]	[-0.021, 0]	[-0.012, 0.01]	[-0.006, 0.015]	[0.017, 0.038]
putamen	[-0.035, -0.013]	[-0.013, 0.008]	[-0.009, 0.012]	[-0.011, 0.01]	[0.001, 0.023]	[-0.002, 0.019]	[-0.011, 0.01]	[-0.013, 0.008]	[-0.021, 0]	[-0.022, 0]	[-0.004, 0.017]	[-0.008, 0.014]	[0.026, 0.047]
hippocampus	[-0.027, -0.006]	[-0.019, 0.002]	[-0.01, 0.011]	[-0.021, 0]	[-0.01, 0.011]	[-0.015, 0.007]	[-0.021, 0]	[-0.012, 0.009]	[-0.031, -0.01]	[-0.027, -0.006]	[0.005, 0.026]	[-0.018, 0.003]	[0.014, 0.035]
amygdala	[-0.035, -0.014]	[-0.012, 0.009]	[-0.007, 0.014]	[-0.014, 0.007]	[-0.011, 0.011]	[-0.009, 0.012]	[-0.014, 0.007]	[-0.014, 0.007]	[-0.019, 0.003]	[-0.023, -0.002]	[-0.005, 0.016]	[-0.009, 0.012]	[0.017, 0.038]
ventral_diencephalon	[-0.058, -0.037]	[-0.012, 0.01]	[-0.019, 0.002]	[-0.037, -0.016]	[-0.005, 0.016]	[-0.025, -0.004]	[-0.037, -0.016]	[-0.02, 0.002]	[-0.018, 0.003]	[-0.022, -0.001]	[-0.019, 0.003]	[-0.006, 0.015]	[0.027, 0.049]
lateral_ventricle	[-0.043, -0.022]	[-0.001, 0.02]	[0.003, 0.024]	[-0.004, 0.018]	[-0.01, 0.012]	[-0.007, 0.014]	[-0.004, 0.018]	[-0.014, 0.007]	[0.003, 0.024]	[-0.02, 0.001]	[-0.008, 0.013]	[-0.006, 0.015]	[0.011, 0.032]
inferior_lateral_ventricle	[-0.026, -0.005]	[0, 0.021]	[0.007, 0.028]	[0.001, 0.023]	[-0.003, 0.018]	[-0.007, 0.015]	[0.001, 0.023]	[-0.016, 0.005]	[0.004, 0.025]	[-0.012, 0.009]	[-0.012, 0.009]	[0.001, 0.022]	[0.009, 0.03]
3rd_ventricle	[-0.03, -0.009]	[-0.003, 0.018]	[0.003, 0.024]	[-0.013, 0.008]	[-0.002, 0.02]	[-0.007, 0.014]	[-0.013, 0.008]	[-0.024, -0.002]	[-0.008, 0.013]	[-0.021, 0]	[-0.015, 0.006]	[-0.003, 0.018]	[0.011, 0.033]
4th_ventricle	[-0.04, -0.019]	[-0.003, 0.019]	[-0.008, 0.014]	[-0.01, 0.011]	[-0.012, 0.01]	[-0.023, -0.001]	[-0.01, 0.011]	[-0.013, 0.008]	[-0.004, 0.017]	[-0.027, -0.006]	[-0.017, 0.005]	[0.002, 0.023]	[-0.002, 0.019]
CSF	[-0.035, -0.014]	[-0.003, 0.018]	[-0.005, 0.016]	[-0.01, 0.011]	[-0.006, 0.016]	[-0.013, 0.008]	[-0.01, 0.011]	[-0.027, -0.006]	[-0.006, 0.015]	[-0.021, 0]	[-0.011, 0.01]	[-0.004, 0.017]	[0.013, 0.034]
accumbens	[-0.007, 0.015]	[-0.009, 0.013]	[-0.015, 0.006]	[-0.022, -0.001]	[0.006, 0.027]	[-0.013, 0.009]	[-0.022, -0.001]	[-0.01, 0.012]	[-0.024, -0.003]	[-0.011, 0.01]	[-0.008, 0.013]	[-0.005, 0.017]	[0.008, 0.029]
intracranial_volume	[-0.062, -0.04]	[-0.014, 0.007]	[-0.006, 0.015]	[-0.025, -0.004]	[0, 0.021]	[-0.03, -0.008]	[-0.025, -0.004]	[-0.022, 0]	[-0.009, 0.012]	[-0.02, 0.001]	[-0.012, 0.01]	[-0.011, 0.01]	[0.041, 0.062]
p-value	ADHD	ASD	BPD	MDD	OCD	PTSD	SZ	TS	AD	ALS	EP	FTD	PD
brainstem	1.8883e-17	0.255118	0.00266591	0.000269294	0.59523	0.0101155	0.000269294	0.0446911	0.372233	0.397633	0.186145	0.566688	1.24448e-11
thalamus	4.42689e-12	0.261136	0.575104	0.0413809	0.308352	0.00146129	0.0413809	0.373838	0.00059581	0.628086	0.74322	0.607412	3.87942e-11
cerebellum_cortex	1.46314e-12	0.00305427	0.00100859	0.00263255	0.794891	8.53215e-06	0.00263255	0.00632435	0.124141	0.9668	0.322816	0.538343	8.75534e-06
cerebellum_white_matter	1.23569e-10	0.00369382	3.42997e-05	4.62728e-08	0.194529	0.062983	4.62728e-08	0.0052039	0.158799	0.736145	0.196176	0.961717	1.39804e-06
caudate	3.45506e-10	0.540362	0.16933	0.602416	0.0968853	0.815442	0.602416	0.626445	0.0106471	0.0989699	0.537959	0.363852	1.66019e-13
pallidum	1.52188e-09	0.794667	0.36818	0.337714	0.0172786	0.832472	0.337714	0.631618	0.984104	0.0533101	0.8676	0.402276	3.19604e-07
putamen	9.27043e-06	0.666535	0.790915	0.93257	0.0256165	0.125479	0.93257	0.690247	0.0528172	0.0407792	0.227903	0.588551	2.2263e-11
hippocampus	0.00229084	0.12141	0.877798	0.0500811	0.918253	0.458629	0.0500811	0.811942	0.00020198	0.00226575	0.00381653	0.181573	5.25649e-06
amygdala	6.52089e-06	0.803405	0.516184	0.538039	0.984124	0.757251	0.538039	0.529769	0.141932	0.0198454	0.303752	0.797211	3.51328e-07
ventral_diencephalon	2.55016e-18	0.855034	0.125172	1.00109e-06	0.311087	0.00654841	1.00109e-06	0.09573	0.156704	0.0320508	0.137359	0.400201	2.19794e-12
lateral_ventricle	1.61676e-09	0.0734194	0.0128574	0.195979	0.858398	0.502493	0.195979	0.516224	0.0148972	0.0721069	0.607802	0.419791	6.10629e-05
inferior_lateral_ventricle	0.00513932	0.0511065	0.00143489	0.0257112	0.187024	0.470927	0.0257112	0.328942	0.00805163	0.749124	0.803303	0.0309722	0.000320172
3rd_ventricle	0.000361893	0.15807	0.011426	0.663854	0.101252	0.495418	0.663854	0.0156133	0.641173	0.048455	0.411073	0.172317	4.70949e-05
4th_ventricle	4.35954e-08	0.146597	0.577169	0.963502	0.847512	0.0257758	0.963502	0.660538	0.209899	0.00204273	0.269523	0.0193901	0.129535
CSF	8.84952e-06	0.182339	0.299263	0.943726	0.365709	0.678051	0.943726	0.00225379	0.398672	0.0462296	0.957093	0.210958	1.2534e-05
accumbens	0.456956	0.703153	0.410723	0.0337897	0.00222473	0.703513	0.0337897	0.853362	0.0125393	0.962188	0.613328	0.276158	0.000526928
intracranial_volume	5.13479e-21	0.537915	0.424596	0.0072544	0.0572159	0.000430809	0.0072544	0.0434143	0.759125	0.0713459	0.868638	0.914252	4.50782e-21

## Sheet: S5
Table S5. Results of Subsetted Subcortical morphology-PRS association analysis (relative measurements). (Aseg atlas)
beta	ADHD	ASD	BPD	MDD	OCD	PTSD	SZ	TS	AD	ALS	EP	FTD	PD
thalamus	-0.00941829	-0.00492282	-0.00672329	-0.00285925	0.00021321	-0.00713045	-0.00285925	0.00180593	-0.0237197	0.00986733	-0.00144695	0.00419193	0.00824453
caudate	-0.0113792	-0.00153973	0.00612018	0.00465121	0.00440014	0.0119987	0.00465121	0.00315111	-0.0166705	-0.00477606	0.00452482	0.00670467	0.0180073
pallidum	-0.0130942	0.000207931	-0.0072657	0.000898782	0.00949009	0.00754469	0.000898782	0.0076354	-0.00127858	-0.00725973	-0.000552868	0.00563045	0.00728335
putamen	-0.00103073	-0.000460378	-0.000617749	0.00687918	0.00847193	0.0191329	0.00687918	0.00321413	-0.0129292	-0.00728018	0.0083255	0.00414866	0.0147445
hippocampus	0.00330825	-0.0073116	-0.00103347	-0.0058585	-0.00390192	0.00354295	-0.0058585	0.00317232	-0.0221243	-0.0138911	0.0176895	-0.00713288	0.00583831
amygdala	-0.00563958	-9.24535e-06	0.00191649	0.00228098	-0.00405217	0.00961927	0.00228098	0.000832301	-0.00927273	-0.00949845	0.00674704	0.00207495	0.0094196
accumbens	0.0121727	0.0027749	-0.00522783	-0.00925187	0.0149688	0.000806577	-0.00925187	0.00273445	-0.0140807	0.00132116	0.00320151	0.00610328	0.011063
lateral_ventricle	-0.0118732	0.0120041	0.0142648	0.0152468	-0.00396986	0.0126873	0.0152468	0.00162104	0.0124127	-0.00467073	0.00275454	0.0052129	-0.000603457
intracranial_volume	-0.0511061	-0.0033475	0.00434139	-0.0145946	0.010334	-0.0191503	-0.0145946	-0.0109755	0.00166638	-0.00979957	-0.000898779	-0.000585178	0.0511592
Conf. Interval (95%, round up)	ADHD	ASD	BPD	MDD	OCD	PTSD	SZ	TS	AD	ALS	EP	FTD	PD
thalamus	[-0.02, 0.001]	[-0.016, 0.006]	[-0.017, 0.004]	[-0.014, 0.008]	[-0.01, 0.011]	[-0.018, 0.004]	[-0.014, 0.008]	[-0.009, 0.012]	[-0.034, -0.013]	[-0.001, 0.021]	[-0.012, 0.009]	[-0.006, 0.015]	[-0.002, 0.019]
caudate	[-0.022, -0.001]	[-0.012, 0.009]	[-0.005, 0.017]	[-0.006, 0.015]	[-0.006, 0.015]	[0.001, 0.023]	[-0.006, 0.015]	[-0.008, 0.014]	[-0.027, -0.006]	[-0.015, 0.006]	[-0.006, 0.015]	[-0.004, 0.017]	[0.007, 0.029]
pallidum	[-0.024, -0.002]	[-0.01, 0.011]	[-0.018, 0.003]	[-0.01, 0.012]	[-0.001, 0.02]	[-0.003, 0.018]	[-0.01, 0.012]	[-0.003, 0.018]	[-0.012, 0.009]	[-0.018, 0.003]	[-0.011, 0.01]	[-0.005, 0.016]	[-0.003, 0.018]
putamen	[-0.012, 0.01]	[-0.011, 0.01]	[-0.011, 0.01]	[-0.004, 0.018]	[-0.002, 0.019]	[0.008, 0.03]	[-0.004, 0.018]	[-0.007, 0.014]	[-0.024, -0.002]	[-0.018, 0.003]	[-0.002, 0.019]	[-0.007, 0.015]	[0.004, 0.025]
hippocampus	[-0.007, 0.014]	[-0.018, 0.003]	[-0.012, 0.01]	[-0.017, 0.005]	[-0.015, 0.007]	[-0.007, 0.014]	[-0.017, 0.005]	[-0.007, 0.014]	[-0.033, -0.011]	[-0.025, -0.003]	[0.007, 0.028]	[-0.018, 0.004]	[-0.005, 0.016]
amygdala	[-0.016, 0.005]	[-0.011, 0.011]	[-0.009, 0.013]	[-0.008, 0.013]	[-0.015, 0.007]	[-0.001, 0.02]	[-0.008, 0.013]	[-0.01, 0.011]	[-0.02, 0.001]	[-0.02, 0.001]	[-0.004, 0.017]	[-0.009, 0.013]	[-0.001, 0.02]
accumbens	[0.002, 0.023]	[-0.008, 0.013]	[-0.016, 0.005]	[-0.02, 0.001]	[0.004, 0.026]	[-0.01, 0.011]	[-0.02, 0.001]	[-0.008, 0.013]	[-0.025, -0.003]	[-0.009, 0.012]	[-0.007, 0.014]	[-0.005, 0.017]	[0, 0.022]
lateral_ventricle	[-0.023, -0.001]	[0.001, 0.023]	[0.004, 0.025]	[0.005, 0.026]	[-0.015, 0.007]	[0.002, 0.023]	[0.005, 0.026]	[-0.009, 0.012]	[0.002, 0.023]	[-0.015, 0.006]	[-0.008, 0.013]	[-0.005, 0.016]	[-0.011, 0.01]
intracranial_volume	[-0.062, -0.04]	[-0.014, 0.007]	[-0.006, 0.015]	[-0.025, -0.004]	[0, 0.021]	[-0.03, -0.008]	[-0.025, -0.004]	[-0.022, 0]	[-0.009, 0.012]	[-0.02, 0.001]	[-0.012, 0.01]	[-0.011, 0.01]	[0.041, 0.062]
p-value	ADHD	ASD	BPD	MDD	OCD	PTSD	SZ	TS	AD	ALS	EP	FTD	PD
thalamus	0.0830756	0.36482	0.21606	0.598751	0.968691	0.189775	0.598751	0.739547	1.25926e-05	0.0692956	0.789953	0.44031	0.129079
caudate	0.0363445	0.776935	0.260332	0.392215	0.418128	0.0274131	0.392215	0.562026	0.00215735	0.379494	0.40506	0.217317	0.000920579
pallidum	0.016005	0.969477	0.181406	0.868667	0.0807241	0.165451	0.868667	0.159975	0.813983	0.18155	0.918959	0.300136	0.18013
putamen	0.849639	0.932493	0.909546	0.205719	0.119019	0.000436326	0.205719	0.554242	0.0173564	0.180382	0.125531	0.445255	0.00666446
hippocampus	0.542639	0.178263	0.849171	0.280904	0.472517	0.514662	0.280904	0.559181	4.62668e-05	0.0105402	0.00112556	0.189112	0.282423
amygdala	0.299604	0.998643	0.724489	0.674789	0.455893	0.0770382	0.674789	0.878282	0.0879647	0.0805025	0.214416	0.702617	0.0830462
accumbens	0.0251584	0.609647	0.336322	0.0887751	0.00587843	0.882142	0.0887751	0.614858	0.00957057	0.807932	0.555796	0.261437	0.041782
lateral_ventricle	0.0289267	0.0271452	0.00868243	0.00502291	0.464976	0.0196617	0.00502291	0.765428	0.0223328	0.389975	0.612161	0.337339	0.911562
intracranial_volume	5.13479e-21	0.537915	0.424596	0.0072544	0.0572159	0.000430809	0.0072544	0.0434143	0.759125	0.0713459	0.868638	0.914252	4.50782e-21
Results of All Subcortical morphology-PRS association analysis (relative measurements). (Aseg atlas)
beta	ADHD	ASD	BPD	MDD	OCD	PTSD	SZ	TS	AD	ALS	EP	FTD	PD
brainstem	-0.0212593	-0.00476987	-0.0225109	-0.0137701	-0.0103753	-0.00359774	-0.0137701	-0.00616933	-0.00660614	0.000688244	-0.00770965	0.00450695	0.0104632
thalamus	-0.00941829	-0.00492282	-0.00672329	-0.00285925	0.00021321	-0.00713045	-0.00285925	0.00180593	-0.0237197	0.00986733	-0.00144695	0.00419193	0.00824453
cerebellum_cortex	-0.0190862	-0.0160556	-0.021734	-0.0113754	-0.00637322	-0.0177787	-0.0113754	-0.0114392	0.00825826	0.00465893	-0.00528256	0.0040039	0.00362456
cerebellum_white_matter	-0.0129019	-0.0158319	-0.0278551	-0.0261078	-0.0133144	-0.0011667	-0.0261078	-0.0117272	-0.00948949	0.0024853	-0.00721225	0.000876111	0.00335989
caudate	-0.0113792	-0.00153973	0.00612018	0.00465121	0.00440014	0.0119987	0.00465121	0.00315111	-0.0166705	-0.00477606	0.00452482	0.00670467	0.0180073
pallidum	-0.0130942	0.000207931	-0.0072657	0.000898782	0.00949009	0.00754469	0.000898782	0.0076354	-0.00127858	-0.00725973	-0.000552868	0.00563045	0.00728335
putamen	-0.00103073	-0.000460378	-0.000617749	0.00687918	0.00847193	0.0191329	0.00687918	0.00321413	-0.0129292	-0.00728018	0.0083255	0.00414866	0.0147445
hippocampus	0.00330825	-0.0073116	-0.00103347	-0.0058585	-0.00390192	0.00354295	-0.0058585	0.00317232	-0.0221243	-0.0138911	0.0176895	-0.00713288	0.00583831
amygdala	-0.00563958	-9.24535e-06	0.00191649	0.00228098	-0.00405217	0.00961927	0.00228098	0.000832301	-0.00927273	-0.00949845	0.00674704	0.00207495	0.0094196
ventral_diencephalon	-0.02015	0.00162748	-0.0139768	-0.0223353	-0.000948089	-0.00289972	-0.0223353	-0.00308184	-0.0113661	-0.00760894	-0.00942918	0.00677437	0.00894908
lateral_ventricle	-0.0118732	0.0120041	0.0142648	0.0152468	-0.00396986	0.0126873	0.0152468	0.00162104	0.0124127	-0.00467073	0.00275454	0.0052129	-0.000603457
inferior_lateral_ventricle	-0.00139543	0.0116804	0.017526	0.0172633	0.00485388	0.00942438	0.0172633	-0.00244753	0.0135073	0.00178215	-0.00080024	0.0129395	0.00634032
3rd_ventricle	0.000187084	0.00996718	0.0141127	0.00434288	0.00548154	0.0121904	0.00434288	-0.00920974	0.00193661	-0.00682756	-0.00407093	0.00806887	0.00235621
4th_ventricle	-0.0164403	0.0095433	0.00221642	0.00583619	-0.00394942	-0.00681863	0.00583619	0.000267551	0.00624343	-0.0141926	-0.0057959	0.0143004	-0.00626079
CSF	-0.00472049	0.00972511	0.00452268	0.0066779	0.000442758	0.00598169	0.0066779	-0.0138687	0.00403753	-0.0076752	-0.000255662	0.00817137	0.00480794
accumbens	0.0121727	0.0027749	-0.00522783	-0.00925187	0.0149688	0.000806577	-0.00925187	0.00273445	-0.0140807	0.00132116	0.00320151	0.00610328	0.011063
intracranial_volume	-0.0511061	-0.0033475	0.00434139	-0.0145946	0.010334	-0.0191503	-0.0145946	-0.0109755	0.00166638	-0.00979957	-0.000898779	-0.000585178	0.0511592
Conf. Interval (95%, round up)	ADHD	ASD	BPD	MDD	OCD	PTSD	SZ	TS	AD	ALS	EP	FTD	PD
brainstem	[-0.032, -0.011]	[-0.015, 0.006]	[-0.033, -0.012]	[-0.024, -0.003]	[-0.021, 0]	[-0.014, 0.007]	[-0.024, -0.003]	[-0.017, 0.004]	[-0.017, 0.004]	[-0.01, 0.011]	[-0.018, 0.003]	[-0.006, 0.015]	[0, 0.021]
thalamus	[-0.02, 0.001]	[-0.016, 0.006]	[-0.017, 0.004]	[-0.014, 0.008]	[-0.01, 0.011]	[-0.018, 0.004]	[-0.014, 0.008]	[-0.009, 0.012]	[-0.034, -0.013]	[-0.001, 0.021]	[-0.012, 0.009]	[-0.006, 0.015]	[-0.002, 0.019]
cerebellum_cortex	[-0.03, -0.008]	[-0.027, -0.005]	[-0.032, -0.011]	[-0.022, -0.001]	[-0.017, 0.004]	[-0.028, -0.007]	[-0.022, -0.001]	[-0.022, -0.001]	[-0.002, 0.019]	[-0.006, 0.015]	[-0.016, 0.005]	[-0.007, 0.015]	[-0.007, 0.014]
cerebellum_white_matter	[-0.024, -0.002]	[-0.026, -0.005]	[-0.039, -0.017]	[-0.037, -0.015]	[-0.024, -0.003]	[-0.012, 0.009]	[-0.037, -0.015]	[-0.022, -0.001]	[-0.02, 0.001]	[-0.008, 0.013]	[-0.018, 0.003]	[-0.01, 0.012]	[-0.007, 0.014]
caudate	[-0.022, -0.001]	[-0.012, 0.009]	[-0.005, 0.017]	[-0.006, 0.015]	[-0.006, 0.015]	[0.001, 0.023]	[-0.006, 0.015]	[-0.008, 0.014]	[-0.027, -0.006]	[-0.015, 0.006]	[-0.006, 0.015]	[-0.004, 0.017]	[0.007, 0.029]
pallidum	[-0.024, -0.002]	[-0.01, 0.011]	[-0.018, 0.003]	[-0.01, 0.012]	[-0.001, 0.02]	[-0.003, 0.018]	[-0.01, 0.012]	[-0.003, 0.018]	[-0.012, 0.009]	[-0.018, 0.003]	[-0.011, 0.01]	[-0.005, 0.016]	[-0.003, 0.018]
putamen	[-0.012, 0.01]	[-0.011, 0.01]	[-0.011, 0.01]	[-0.004, 0.018]	[-0.002, 0.019]	[0.008, 0.03]	[-0.004, 0.018]	[-0.007, 0.014]	[-0.024, -0.002]	[-0.018, 0.003]	[-0.002, 0.019]	[-0.007, 0.015]	[0.004, 0.025]
hippocampus	[-0.007, 0.014]	[-0.018, 0.003]	[-0.012, 0.01]	[-0.017, 0.005]	[-0.015, 0.007]	[-0.007, 0.014]	[-0.017, 0.005]	[-0.007, 0.014]	[-0.033, -0.011]	[-0.025, -0.003]	[0.007, 0.028]	[-0.018, 0.004]	[-0.005, 0.016]
amygdala	[-0.016, 0.005]	[-0.011, 0.011]	[-0.009, 0.013]	[-0.008, 0.013]	[-0.015, 0.007]	[-0.001, 0.02]	[-0.008, 0.013]	[-0.01, 0.011]	[-0.02, 0.001]	[-0.02, 0.001]	[-0.004, 0.017]	[-0.009, 0.013]	[-0.001, 0.02]
ventral_diencephalon	[-0.031, -0.01]	[-0.009, 0.012]	[-0.025, -0.003]	[-0.033, -0.012]	[-0.012, 0.01]	[-0.014, 0.008]	[-0.033, -0.012]	[-0.014, 0.008]	[-0.022, -0.001]	[-0.018, 0.003]	[-0.02, 0.001]	[-0.004, 0.017]	[-0.002, 0.02]
lateral_ventricle	[-0.023, -0.001]	[0.001, 0.023]	[0.004, 0.025]	[0.005, 0.026]	[-0.015, 0.007]	[0.002, 0.023]	[0.005, 0.026]	[-0.009, 0.012]	[0.002, 0.023]	[-0.015, 0.006]	[-0.008, 0.013]	[-0.005, 0.016]	[-0.011, 0.01]
inferior_lateral_ventricle	[-0.012, 0.009]	[0.001, 0.022]	[0.007, 0.028]	[0.007, 0.028]	[-0.006, 0.016]	[-0.001, 0.02]	[0.007, 0.028]	[-0.013, 0.008]	[0.003, 0.024]	[-0.009, 0.012]	[-0.011, 0.01]	[0.002, 0.024]	[-0.004, 0.017]
3rd_ventricle	[-0.01, 0.011]	[-0.001, 0.021]	[0.003, 0.025]	[-0.006, 0.015]	[-0.005, 0.016]	[0.002, 0.023]	[-0.006, 0.015]	[-0.02, 0.001]	[-0.009, 0.013]	[-0.017, 0.004]	[-0.015, 0.007]	[-0.003, 0.019]	[-0.008, 0.013]
4th_ventricle	[-0.027, -0.006]	[-0.001, 0.02]	[-0.008, 0.013]	[-0.005, 0.016]	[-0.015, 0.007]	[-0.017, 0.004]	[-0.005, 0.016]	[-0.01, 0.011]	[-0.004, 0.017]	[-0.025, -0.004]	[-0.016, 0.005]	[0.004, 0.025]	[-0.017, 0.004]
CSF	[-0.015, 0.006]	[-0.001, 0.02]	[-0.006, 0.015]	[-0.004, 0.017]	[-0.01, 0.011]	[-0.005, 0.017]	[-0.004, 0.017]	[-0.025, -0.003]	[-0.007, 0.015]	[-0.018, 0.003]	[-0.011, 0.01]	[-0.002, 0.019]	[-0.006, 0.015]
accumbens	[0.002, 0.023]	[-0.008, 0.013]	[-0.016, 0.005]	[-0.02, 0.001]	[0.004, 0.026]	[-0.01, 0.011]	[-0.02, 0.001]	[-0.008, 0.013]	[-0.025, -0.003]	[-0.009, 0.012]	[-0.007, 0.014]	[-0.005, 0.017]	[0, 0.022]
intracranial_volume	[-0.062, -0.04]	[-0.014, 0.007]	[-0.006, 0.015]	[-0.025, -0.004]	[0, 0.021]	[-0.03, -0.008]	[-0.025, -0.004]	[-0.022, 0]	[-0.009, 0.012]	[-0.02, 0.001]	[-0.012, 0.01]	[-0.011, 0.01]	[0.041, 0.062]
p-value	ADHD	ASD	BPD	MDD	OCD	PTSD	SZ	TS	AD	ALS	EP	FTD	PD
brainstem	9.12356e-05	0.379862	3.43018e-05	0.0112599	0.056104	0.508188	0.0112599	0.256027	0.223897	0.899171	0.155771	0.406684	0.054055
thalamus	0.0830756	0.36482	0.21606	0.598751	0.968691	0.189775	0.598751	0.739547	1.25926e-05	0.0692956	0.789953	0.44031	0.129079
cerebellum_cortex	0.000442123	0.00310892	6.31358e-05	0.0362406	0.240535	0.00107281	0.0362406	0.0351513	0.128321	0.390927	0.330652	0.46094	0.504478
cerebellum_white_matter	0.017617	0.00357039	2.97758e-07	1.55336e-06	0.0142654	0.830165	1.55336e-06	0.0309002	0.0807323	0.647392	0.184385	0.871909	0.536344
caudate	0.0363445	0.776935	0.260332	0.392215	0.418128	0.0274131	0.392215	0.562026	0.00215735	0.379494	0.40506	0.217317	0.000920579
pallidum	0.016005	0.969477	0.181406	0.868667	0.0807241	0.165451	0.868667	0.159975	0.813983	0.18155	0.918959	0.300136	0.18013
putamen	0.849639	0.932493	0.909546	0.205719	0.119019	0.000436326	0.205719	0.554242	0.0173564	0.180382	0.125531	0.445255	0.00666446
hippocampus	0.542639	0.178263	0.849171	0.280904	0.472517	0.514662	0.280904	0.559181	4.62668e-05	0.0105402	0.00112556	0.189112	0.282423
amygdala	0.299604	0.998643	0.724489	0.674789	0.455893	0.0770382	0.674789	0.878282	0.0879647	0.0805025	0.214416	0.702617	0.0830462
ventral_diencephalon	0.000208547	0.764474	0.010113	3.93622e-05	0.861438	0.593849	3.93622e-05	0.570464	0.0363912	0.161272	0.08257	0.212347	0.0994464
lateral_ventricle	0.0289267	0.0271452	0.00868243	0.00502291	0.464976	0.0196617	0.00502291	0.765428	0.0223328	0.389975	0.612161	0.337339	0.911562
inferior_lateral_ventricle	0.797348	0.0315312	0.00125961	0.00148638	0.371549	0.0830708	0.00148638	0.652296	0.0128946	0.742853	0.882879	0.0172139	0.243125
3rd_ventricle	0.972532	0.0664695	0.00939386	0.424052	0.312819	0.024943	0.424052	0.0899199	0.721406	0.208699	0.453503	0.13736	0.664401
4th_ventricle	0.00249469	0.0790909	0.683551	0.283021	0.467403	0.210091	0.283021	0.960736	0.250639	0.00901248	0.286206	0.00850429	0.249319
CSF	0.385168	0.0734809	0.405438	0.219199	0.935055	0.271456	0.219199	0.0106936	0.457441	0.157783	0.962471	0.132617	0.37623
accumbens	0.0251584	0.609647	0.336322	0.0887751	0.00587843	0.882142	0.0887751	0.614858	0.00957057	0.807932	0.555796	0.261437	0.041782
intracranial_volume	5.13479e-21	0.537915	0.424596	0.0072544	0.0572159	0.000430809	0.0072544	0.0434143	0.759125	0.0713459	0.868638	0.914252	4.50782e-21

## Sheet: S6
Table S6. Results of bidirectional GSMR analysis.
forward_OR	ADHD	ASD	BPD	MDD	OCD	PTSD	SZ	TS	AD	ALS	EP	FTD	PD
surface area	0.835077	0.903555	1.09611	0.954485	0.952965	0.904795	0.837902	NA	1.00257	1.02081	0.975826	1.09501	1.43481
mean thickness	0.905223	1.03723	1.04728	0.962297	1.45161	0.975289	0.987447	NA	1.0012	0.981734	1.24689	1.09989	1.04352
intracranial volume	0.811319	1.09552	1.05466	0.958102	1.17252	0.883929	0.921185	NA	1.01015	1.1259	0.853479	1.02628	1.60639
Conf Interval (95%)
surface area	[0.763493038291065, 0.91337274776198]	[0.810098265607114, 1.00779306912143]	[0.998009575016586, 1.20386117624562]	[0.873924857155726, 1.04247232377041]	[0.68369874692916, 1.32827814989868]	[0.80402184497993, 1.01819827225862]	[0.772471469837881, 0.908875725517126]	NA	[0.981822912210182, 1.02376494570537]	[0.866971216374994, 1.20195707524788]	[0, Inf]	[0.719338562412809, 1.66686862092038]	[1.20735945209007, 1.7051179526795]
mean thickness	[0.830193330326998, 0.987033422925489]	[0.918169462514043, 1.17173221692973]	[0.958454683191457, 1.14433866557977]	[0.887626290459087, 1.04324983754314]	[1.0556330248985, 1.99613347349792]	[0.859107542240631, 1.10718172841478]	[0.908949160800781, 1.07272348136935]	NA	[0.980989027966485, 1.02182498244503]	[0.834464359260762, 1.15499452506617]	[1.65329842377839E-158, 9.40388099150167E+157]	[0.741295387245571, 1.63196429665183]	[0.873353798735691, 1.24684541159033]
intracranial volume	[0.731838502188935, 0.899431611876437]	[0.951047557940481, 1.26194604436969]	[0.951962765261214, 1.16843614915044]	[0.86767873430976, 1.05794784852515]	[0.825912338655735, 1.66459761704904]	[0.762209920275941, 1.0250858841256]	[0.838595847351132, 1.01190780483711]	NA	[0.986965689016132, 1.03386967707362]	[0.941445458705519, 1.34648347616044]	[0, Inf]	[0.653226338585634, 1.61239760502053]	[1.32298928506185, 1.95050364014283]
p-value
surface area	8.09e-05	0.0686612	0.0550665	0.300467	0.776129	0.0967841	2.01448e-05	NA	0.689488	0.804766	0.999968	0.672026	4.13445e-05
mean thickness	0.0240924	0.556786	0.306961	0.351039	0.0218402	0.699015	0.765006	NA	0.370895	0.824072	0.999051	0.636235	0.639034
intracranial volume	7.04e-05	0.206089	0.308602	0.397414	0.373355	0.102633	0.086713	NA	0.842296	0.193943	0.999808	0.910378	1.69816e-06
nsnps (instrument variables)
surface area	16	19	15	15	15	20	15	3	11	18	9	15	17
mean thickness	18	19	18	19	18	21	15	3	10	19	12	18	18
intracranial volume	15	17	15	14	17	18	14	14	9	17	8	16	17
reverse_beta	ADHD	ASD	BPD	MDD	OCD	PTSD	SZ	TS	AD	ALS	EP	FTD	PD
surface area	-0.068173	NA	0.0923774	NA	NA	NA	-0.042095	NA	-0.0841526	-0.123403	NA	NA	0.0218127
mean thickness	0.0720863	NA	-0.0523581	NA	NA	NA	0.0232371	NA	0.0189679	0.00684966	NA	NA	-0.073754
intracranial volume	-0.0959519	NA	0.0474375	NA	NA	NA	-0.0539195	NA	-0.0184181	-0.118655	NA	NA	0.0523428
Conf Interval (95%)
surface area	[-0.166992,0.030646]	NA	[0.012862,0.171892]	NA	NA	NA	[-0.072035,-0.012156]	NA	[-0.176022,0.007718]	[-0.239350,-0.007456]	NA	NA	[0.061153,0.104778]
mean thickness	[-0.023655,0.167828]	NA	[-0.132498,0.027781]	NA	NA	NA	[-0.006631,0.053106]	NA	[-0.073428,0.111364]	[-0.106067,0.119767]	NA	NA	[-0.155315,0.007807]
intracranial volume	[-0.192311,0.000407]	NA	[-0.030931,0.125806]	NA	NA	NA	[-0.083658,-0.024181]	NA	[-0.110139,0.073303]	[-0.234209,-0.003101]	NA	NA	[-0.030655,0.135340]
p-value
surface area	0.176323	NA	0.0204434	NA	NA	NA	0.00582173	NA	0.0755029	0.037678	NA	NA	0.606336
mean thickness	0.140016	NA	0.197195	NA	NA	NA	0.128471	NA	0.689649	0.905326	NA	NA	0.0763316
intracranial volume	0.0509709	NA	0.234773	NA	NA	NA	0.000451829	NA	0.695782	0.0435641	NA	NA	0.216429
nsnps (instrument variables)
surface area	6	0	33	0	0	0	190	0	5	3	0	0	20
mean thickness	6	0	32	0	0	0	189	0	5	3	0	0	21
intracranial volume	6	0	33	0	0	0	189	0	5	3	0	0	20

## Sheet: S7
Table S7. Results of forward MR analysis.
MR_egger regression
OR	ADHD	ASD	BPD	MDD	OCD	PTSD	SZ	TS	AD	ALS	EP	FTD	PD
surface area	0.808599	0.608995	1.15648	0.81927	1.81008	0.91534	1.47181	NA	1.00695	0.894946	1.03518	0.748421	1.59556
mean thickness	0.718127	0.622412	1.56965	0.950371	2.14257	1.11058	1.78215	NA	1.0101	1.05904	1.4418	2.1368	1.1418
intracranial volume	0.883645	1.34094	0.821218	1.04178	0.734553	0.940208	0.827827	NA	0.951996	1.02663	0.869398	1.17434	1.49039
Conf Interval (95%)
surface area	[0.5624373088,1.162498018]	[0.4118668697, 0.9004730428]	[0.6566342553,2.036828033]	[0.5931351619, 1.131619846]	[0.5819148034,5.63035117]	[0.5727565976, 1.257923853]	[0.850041748,2.548383287]	NA	[0.8933959428,1.134936312]	[0.5157704612,1.552877773]	[0, Inf]	[0.1100777119, 5.088533773]	[0.7836798674, 3.248553455]
mean thickness	[0.7181270943, 0.493540836]	[0.3191591814, 1.213804849]	[0.9542174821, 2.582000892]	[0.7063783548, 1.278641182]	[0.5077302043, 9.041424873]	[0.6406929737, 1.925096703]	[0.9034904896, 3.515329262]	NA	[0.9289119525, 1.098376597]	[0.4753584156, 2.35938861]	[0, Inf]	[0.374615611, 12.18831502]	[0.4871085543, 2.676443471]
intracranial volume	[0.8836452256, 0.5312665562]	[0.7548567403, 2.382078676]	[0.4451815969, 1.514886748]	[0.6501535339, 1.669311461]	[0.1895495791, 2.846577132]	[0.5540731557, 1.595440184]	[0.3926961062, 1.745109745]	NA	[0.8458061412, 1.071518656]	[0.4859471186, 2.168901442]	[0, Inf]	[0.1024482669, 13.46126236]	[0.5518687824, 4.025003127]
p-value
surface area	0.232626	0.0155312	0.5936	0.208105	0.282603	0.569771	0.154205	NA	0.905334	0.678095	0.999988	0.752738	0.183515
mean thickness	0.0796634	0.153726	0.0728272	0.721836	0.278444	0.694287	0.0898885	NA	0.804546	0.882094	0.99933	0.368971	0.74568
intracranial volume	0.611873	0.297592	0.505037	0.854956	0.63701	0.809823	0.598584	NA	0.395881	0.941963	0.999922	0.891074	0.408532
nsnps (instrument variables)
surface area	22	22	18	17	17	24	17	NA	14	21	9	18	19
mean thickness	21	21	18	19	18	21	17	NA	10	20	12	18	18
intracranial volume	20	20	18	16	19	21	18	NA	12	20	9	19	19
MR_inverse-variance weighted
OR	ADHD	ASD	BPD	MDD	OCD	PTSD	SZ	TS	AD	ALS	EP	FTD	PD
surface area	0.843395	0.9176	1.05855	0.954752	1.00595	0.877088	0.844003	NA	0.99281	1.01223	0.975867	1.13084	1.4837
mean thickness	0.897586	1.03994	1.05146	0.961869	1.44819	0.966504	0.991344	0.795888	0.99816	0.884853	1.24595	1.10647	1.04592
intracranial volume	0.812406	1.08463	1.04668	0.955564	1.20258	0.844984	0.84056	0.750112	0.996503	1.10763	0.851617	1.01829	1.6914
Conf Interval (95%)
surface area	[0.768474546030859, 0.925619991413748]	[0.787858122763711, 1.06870811820515]	[0.91564790705948, 1.22376556023856]	[0.877421779717482, 1.03889759350101]	[0.743977221414536, 1.36016059103014]	[0.788223435328371, 0.975972252248005]	[0.720275055949347, 0.9889856052196]	NA	[0.960600592188604, 1.02609861475854]	[0.873928169338643, 1.17241166508341]	[0, Inf]	[0.708600503550775, 1.80467391952419]	[1.24212912993948, 1.77226191183038]
mean thickness	[0.810893223452764, 0.993546959423465]	[0.851522742066445, 1.27005142286892]	[0.91109595797164, 1.21344681254866]	[0.887923909542384, 1.04197241708976]	[1.01347832996686, 2.06937449042849]	[0.831017383423535, 1.12407884940857]	[0.836124473436565, 1.17537952498616]	[0.385657611782936, 1.64248598290454]	[0.976068276493217, 1.02075264646608]	[0.719654492529066, 1.08797247188072]	[6.68236109894016E-158, 2.32313663769697E+157]	[0.69316330511765, 1.76621502685846]	[0.831470708457966, 1.31567614028143]
intracranial volume	[0.715038016015146, 0.923031706302927]	[0.940506023916478, 1.25084975873051]	[0.895277224773784, 1.22369004594403]	[0.860526583869417, 1.06109760438115]	[0.871741469326321, 1.65898202224538]	[0.73921412518071, 0.965887841511324]	[0.703180053428493, 1.00477974680391]	[0.358372092681873, 1.57006476896355]	[0.965540927654805, 1.02845744194328]	[0.943038794771499, 1.30095484713407]	[0, Inf]	[0.565468787147113, 1.83372729640245]	[1.34621171504643, 2.1250988372207]
p-value
surface area	0.000332655	0.268886	0.441867	0.282605	0.969272	0.016118	0.035999	NA	0.668021	0.871197	0.999968	0.60614	1.35293e-05
mean thickness	0.0370761	0.700968	0.492464	0.340806	0.0420001	0.65839	0.920295	0.536833	0.871902	0.245929	0.99905	0.671546	0.70135
intracranial volume	0.00142454	0.264072	0.5671	0.395086	0.261099	0.013561	0.0564393	0.445483	0.82778	0.212962	0.99972	0.951842	6.39902e-06
nsnps (instrument variables)
surface area	22	22	18	17	17	24	17	NA	14	21	9	18	19
mean thickness	21	21	18	19	18	21	17	2	10	20	12	18	18
intracranial volume	20	20	18	16	19	21	18	2	12	20	9	19	19
MR_weighted mean
OR	ADHD	ASD	BPD	MDD	OCD	PTSD	SZ	TS	AD	ALS	EP	FTD	PD
surface area	0.834223	0.895831	1.02751	0.930231	1.07387	0.822009	1.03859	NA	0.991385	0.937778	0.970942	0.915343	1.53393
mean thickness	0.88714	1.0352	1.09756	0.943806	1.43864	1.02617	0.99499	NA	1.00429	0.98776	1.27782	0.940772	1.11928
intracranial volume	0.820691	1.104	0.97086	0.947819	1.26796	0.839126	0.943003	NA	0.988166	1.00994	0.851127	0.932168	1.58677
Conf Interval (95%)
surface area	[0.742607029231859, 0.937141963150146]	[0.761657579006355, 1.05364075816765]	[0.888757955360936, 1.18791755929957]	[0.824773202185717, 1.04917201500687]	[0.694901078571129, 1.65949953352436]	[0.706653691107602, 0.956196033383796]	[0.914835356245761, 1.17909027681016]	NA	[0.956926615020432, 1.02708335880263]	[0.767822364018906, 1.145352316046]	[0, Inf]	[0.522672610688873, 1.60301585084075]	[1.21511653904128, 1.93640367369341]
mean thickness	[0.783581690116345, 1.00438449089532]	[0.864665683552146, 1.23937891031847]	[0.956434137983495, 1.2595190543303]	[0.847061908489947, 1.05159983180069]	[0.926188699675923, 2.23461261321915]	[0.856545900949684, 1.22937982595647]	[0.883193735167393, 1.12093845972329]	NA	[0.976824803394791, 1.03252236288654]	[0.788984837540908, 1.23661411527946]	[1.07997980398916E-180, 1.51189096296337E+180]	[0.534643342898426, 1.65540787803028]	[0.849443140806599, 1.47482327641438]
intracranial volume	[0.713919413223366, 0.943430673224912]	[0.920173061451436, 1.32455553981573]	[0.837430127636678, 1.1255494806104]	[0.831540872823923, 1.08035717300747]	[0.8046887974136, 1.99795247671163]	[0.697656617225397, 1.00928192847636]	[0.817700000531059, 1.08750663219304]	NA	[0.956088347639241, 1.0213208220722]	[0.807500531349343, 1.26312716036837]	[0, Inf]	[0.482252740652084, 1.8018282984099]	[1.22205923740993, 2.060327058]
p-value
surface area	0.00225974	0.188586	0.708858	0.233479	0.74765	0.0130262	0.540792	NA	0.63165	0.544771	0.999968	0.766147	0.000519354
mean thickness	0.0586351	0.701067	0.164085	0.30695	0.104784	0.784456	0.934413	NA	0.762315	0.910649	0.999066	0.834434	0.414272
intracranial volume	0.00545431	0.300873	0.700627	0.414978	0.319065	0.0527221	0.395267	NA	0.479557	0.931816	0.999766	0.837737	0.000777697
nsnps (instrument variables)
surface area	22	22	18	17	17	24	17	NA	14	21	9	18	19
mean thickness	21	21	18	19	18	21	17	NA	10	20	12	18	18
intracranial volume	20	20	18	16	19	21	18	NA	12	20	9	19	19
MR_weighted mode
OR	ADHD	ASD	BPD	MDD	OCD	PTSD	SZ	TS	AD	ALS	EP	FTD	PD
surface area	0.83801	0.823178	1.0849	0.903509	1.14292	0.797988	1.06389	NA	0.984987	0.863727	0.959817	0.796966	1.59216
mean thickness	0.873193	1.05029	1.12644	0.88061	1.40897	1.0574	0.981288	NA	0.998448	1.00035	1.27885	0.833837	1.18914
intracranial volume	0.859388	1.16801	0.839936	0.959462	1.21671	0.815424	1.01667	NA	0.982278	0.924248	0.850092	0.821926	1.34309
Conf Interval (95%)
surface area	[0.690135544873529, 1.01756895495434]	[0.548943833709451, 1.23441136161569]	[0.730492276454635, 1.61126771979825]	[0.753542596687479, 1.08332184994468]	[0.546731710879865, 2.38920777996181]	[0.639660608692348, 0.995504724262181]	[0.924930081478677, 1.22373312567109]	NA	[0.893848280797243, 1.08541832368679]	[0.610243234425041, 1.22250436429916]	[0, Inf]	[0.295104616492742, 2.15230600885217]	[1.08867898405396, 2.32849108782111]
mean thickness	[0.709855615212484, 1.07411539391667]	[0.752095586007848, 1.46671994335396]	[0.908193262576092, 1.39712736949875]	[0.711732919422932, 1.08955669544179]	[0.646818616067358, 3.06918853468505]	[0.80897046964376, 1.38212961067961]	[0.82711412269082, 1.16420007776588]	NA	[0.959563346552718, 1.03890846279671]	[0.714682372298682, 1.40019040945657]	[9.67994062865158E-195, 1.68954426842797E+194]	[0.17815923116967, 3.90260200478428]	[0.728931179589714, 1.93989624931267]
intracranial volume	[0.645909903966163, 1.14342166220024]	[0.819806542862982, 1.6641085057897]	[0.644342411927501, 1.09490402326409]	[0.74277469443648, 1.23936279753115]	[0.486897350811699, 3.04042531404797]	[0.586400520340694, 1.13389529586258]	[0.825868017212905, 1.25156157963278]	NA	[0.919369080027331, 1.04949060696286]	[0.595340404288277, 1.43486809947812]	[0, Inf]	[0.147012071408398, 4.59528612502402]	[0.86386912434457, 2.08814743964523]
p-value
surface area	0.0717249	0.30528	0.671686	0.267262	0.707692	0.0458691	0.34018	NA	0.749665	0.394364	0.999962	0.651184	0.019255
mean thickness	0.185036	0.74277	0.272548	0.20035	0.372117	0.668397	0.805836	NA	0.935808	0.99837	0.999016	0.784414	0.465395
intracranial volume	0.277205	0.336509	0.169188	0.730488	0.66505	0.211444	0.863618	NA	0.58017	0.706739	0.999793	0.791105	0.177258
nsnps (instrument variables)
surface area	22	22	18	17	17	24	17	NA	14	21	9	18	19
mean thickness	21	21	18	19	18	21	17	NA	10	20	12	18	18
intracranial volume	20	20	18	16	19	21	18	NA	12	20	9	19	19

## Sheet: S8
Table S8. Results of comparative analysis contrasting brain maps associated with disease states and genetic risk.
1. Surface Area	ADHD	ASD	BPD	MDD	OCD	SZ	EP	PD
Cohorts,global_adjust	children,absolute	NA	adult,relative	adult,absolute	adult,relative	total,absolute	NA	total,relative
Sign Concordance Test
porportion agree	1	NA	0.4412	0.2941	0.4706	0.9418	NA	0.3529
conf_interval	[91.57%,100%]	NA	[27.19%,61.05%]	[15.10%,47.48%]	[29.78%,64.87%]	[80.32%,99.28%]	NA	[19.75%,53.51%]
p-value	5.82077e-11	NA	0.804236	0.995479	0.696204	3.46918e-08	NA	0.971194
Correlation Test
Pearson r	0.673	NA	-0.091	0.006	-0.017	-0.161	NA	-0.402
conf_interval	[0.414,0.929]	NA	[-0.436,0.254]	[-0.340,0.352]	[-0.363,0.329]	[-0.503,0.181]	NA	[-0.719,-0.085]
p-value	1.30093e-05	NA	0.610656	0.973095	0.924879	0.362676	NA	0.0183767
Permutaion Test
p-value	1.3e-05	NA	0.6107	0.9731	0.9249	0.3627	NA	0.018
2. Cortical Thickness	ADHD	ASD	BPD	MDD	OCD	SZ	EP	PD
Cohorts,global_adjust	children,relative	total,relative	adult,absolute	adult,absolute	adult,absolute	total,absolute	total,relative	total,absolute
Sign Concordance Test
porportion agree	0.5588	0.6765	0.9118	0.6471	0.4706	0.7553	0.5588	0.7059
conf_interval	[37.89%,72.81%]	[49.47%,82.12%]	[76.32%,98.14%]	[46.49%,80.25%]	[29.78%,64.87%]	[55.64%,87.12%]	[37.89%,72.81%]	[52.52%,84.90%]
p-value	0.303796	0.0288063	3.83006e-07	0.0607247	0.696204	0.00452059	0.303796	0.0121533
Correlation Test
Pearson r	0.338	0.454	0.437	-0.253	0.315	0.379	-0.407	0.103
conf_interval	[0.012,0.664]	[0.145,0.763]	[0.125,0.749]	[-0.598,0.082]	[-0.014,0.644]	[0.058,0.700]	[-0.723,-0.091]	[-0.242,0.448]
p-value	0.050474	0.00694917	0.00974498	0.149302	0.0695951	0.0269906	0.0169233	0.562257
Permutaion Test
p-value	0.0505	0.0069	0.0097	0.1493	0.0696	0.0269906	0.0169	0.5623
3. Subcortical Volume	ADHD	ASD	BPD	MDD	OCD	SZ	EP	PD
Cohorts,global_adjust	children,relative	total,relative	adult,relative	adult,relative	adult,relative	total,absolute	total,relative	total,relative
Sign Concordance Test
porportion agree	0.7143	0.7143	0.8571	0.7143	0.7143	0.7143	0.4286	0.1667
conf_interval	[29.04%,96.33%]	[29.04%,96.33%]	[42.13%,99.64%]	[29.04%,96.33%]	[29.04%,96.33%]	[29.04%,96.33%]	[9.9%,81.59%]	[0.42%,64.12%]
p-value	0.226562	0.226562	0.0625	0.226562	0.226562	0.226562	0.773438	0.984375
Correlation Test
Pearson r	-0.582	-0.579	0.045	0.082	0.694	0.248	-0.189	-0.924
conf_interval	[-1.295,0.131]	[-1.294,0.136]	[-0.831,0.921]	[-0.792,0.956]	[0.063,1.325]	[-0.601,1.097]	[-1.050,0.672]	[-1.298,-0.550]
p-value	0.170017	0.173624	0.923184	0.860736	0.0839478	0.591149	0.685328	0.00841775
Permutaion Test
p-value	0.1742	0.1656	0.9273	0.8368	0.0811	0.5777	0.6857	0.011

## Sheet: S9
Table S9. Results of binomial analysis.
Global Brain Structure	Disease_PRS	Beta (lm)	Se (lm)	CI (lm)	tv (lm)	p-value (lm)	r2 (lm)	p-value (binomial test)
Mean thickness	BPD	-0.0198363	0.124376	[-0.2635197,0.2238471]	-0.159486	0.873916	-0.0186494	0.0147022
Total surface area	BPD	-0.0666196	0.160327	[-0.3808586,0.2476194]	-0.415523	0.679502	-0.0173006	0.0507416
Intracranial volume	BPD	-0.0827777	0.153741	[-0.3841043,0.2185489]	-0.538424	0.592627	-0.014922	0.209288
Mean thickness	SZ	-0.265954	0.356789	[-0.9652487,0.4333401]	-0.745411	0.480298	-0.0361625	0.0287478
Total surface area	SZ	-0.513387	0.23813	[-0.9801157,-0.0466579]	-2.15591	0.0680178	0.144975	0.00228843
Intracranial volume	SZ	-0.108774	0.422169	[-0.9362019,0.7186545]	-0.257654	0.804084	-0.124631	0.0774572

[truncated: 2 more sheets: S10, S11]
